# Supplementary material
Source: PubMed Central journal article supplement (PMC4746677)
Supplement: supp_tpc.15.00496_TPC2015-00496-RAR3_Supplemental_DataREV.pdf [file supp_tpc.15.00496_TPC2015-00496-RAR3_Supplemental_DataREV.pdf]

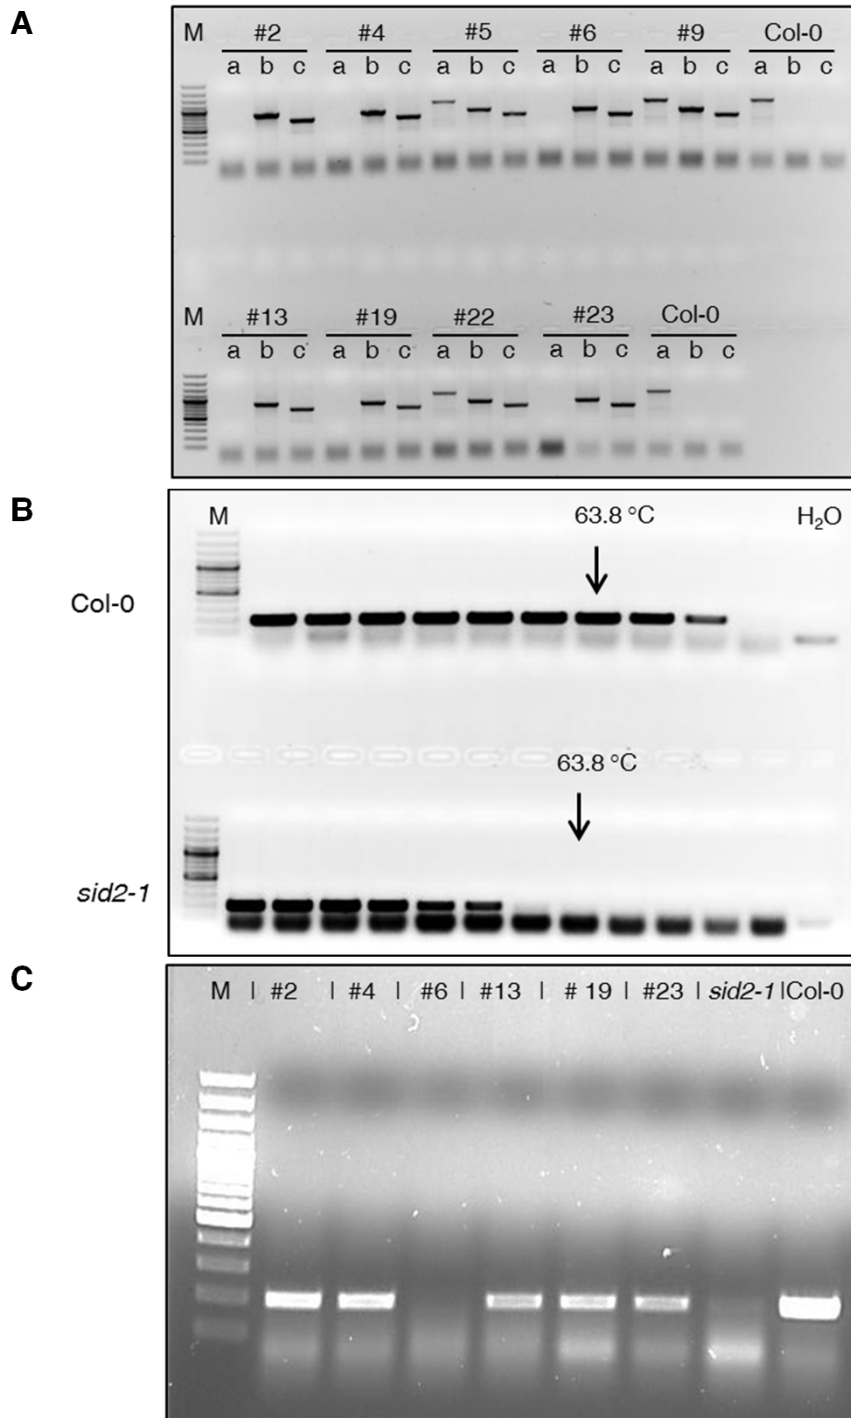

**Supplemental Figure 1.** Identification of the *sid2 ald1* (*sid2-1 ald1*) double mutant.

**(A)** PCR analysis of genomic DNA isolated from Col-0 and F2 *sid2 ald1* candidate lines to screen for *ALD1* T-DNA insertion a: Left genomic primer (LP) and right genomic primer (RP) primer, b: LP and left border T-DNA insertion primer (LB), c: RP and LB primer pair. M = 100 bp marker. Among others, lines #2, #4, #6, #13, #19, #23 were identified as homozygous for the insertion.

**(B)** Gradient PCR (57 - 67°C) using genomic DNA of Col-0 and *sid2-1*, employing the ICS1-FV primer site-specific for the wild-type *ICS1* sequence but not for the point-mutated *sid2-1* variant (in combination with ICS1-RV). 63.8°C was identified as annealing temperature specifically amplifying Col-0 but not *sid2-1* genomic DNA. H<sub>2</sub>O served as a negative control. M = 100 bp marker.

**(C)** PCR analysis of genomic DNA isolated from Col-0, *sid2* and preselected F2 *sid2 ald1* candidate lines. The ICS1-FV/ICS1-RV primer pair and an annealing temperature of 64°C were used. M = 100 bp marker. Lines #6 and #51 (not shown) were identified as *sid2 ald1* double mutant lines homozygous for both mutations and further characterized (Suppl. Fig. 2; Fig. 1).

**A**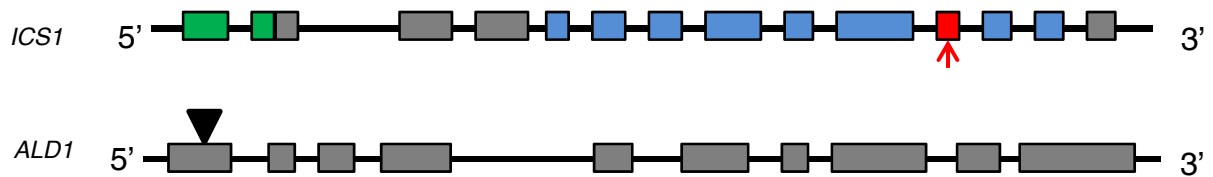**B**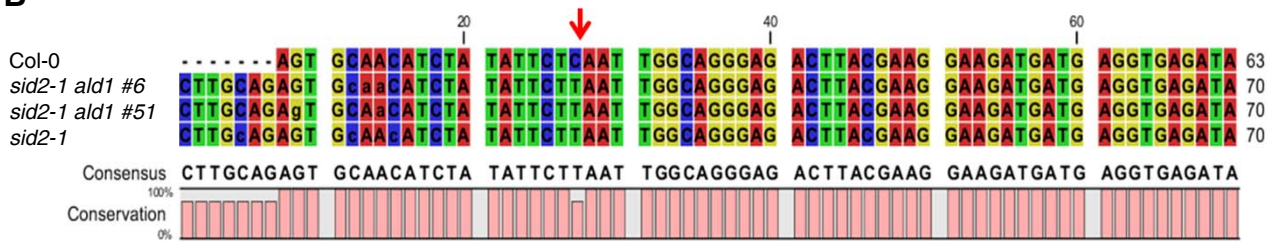**C**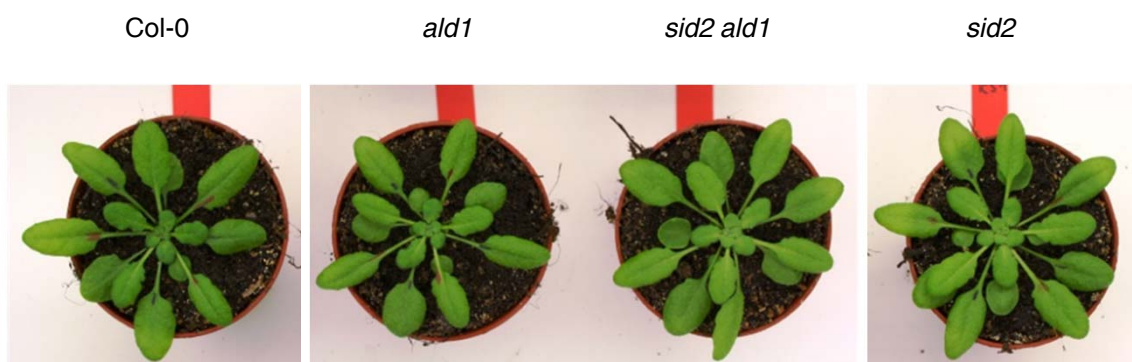**Supplemental Figure 2. Characterization of the *sid2 ald1* double mutant.**

**(A)** Schematic representation of the *ICS1* and *ALD1* genes (5'→3'). *ICS1* contains a putative plastid transit sequence (green) and a chorismate-binding domain (blue). The location of mutations in *sid2-2* and *sid2-1* are indicated with a red box and a red arrow, respectively (modified according to Wildermuth et al., 2001). In the scheme of the *ALD1* locus, the position of the T-DNA insertion (black triangle) of SALK\_007673 is indicated. Boxes represent exons and spaces represent spliced introns.

**(B)** Multiple sequence alignment of Col-0, the positively PCR-tested F2 *sid2 ald1* candidates #6 (Suppl. Fig. 1) and #51, and *sid2-1*.

**(C)** Growth phenotypes of naïve 5-week-old Col-0, *ald1*, *sid2 ald1* and *sid2* plants. The *sid2 ald1* double mutant plants did not show any obvious morphological phenotype that distinguished them from wild-type, *ald1*, or *sid2* plants.

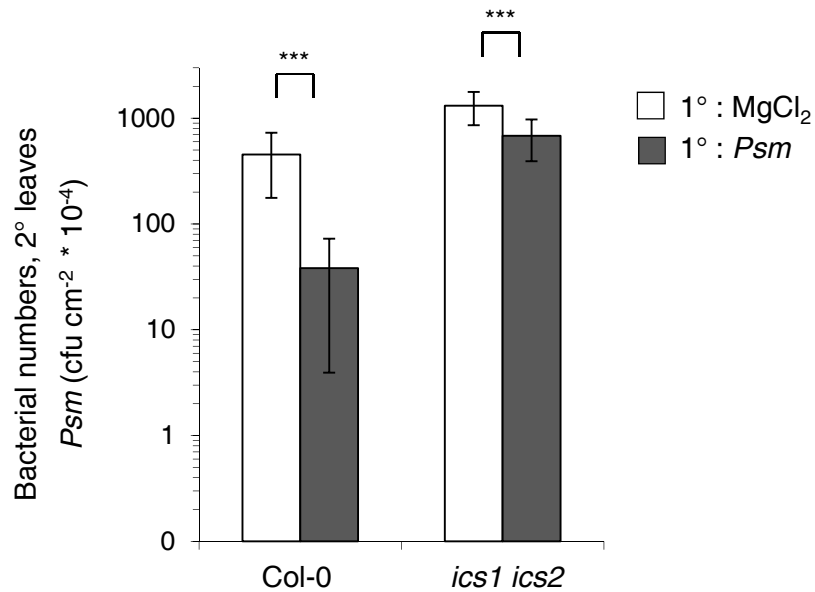

**Supplemental Figure 3.** Systemic acquired resistance assay with *Col-0* and *ics1 ics2* plants.

Lower ( $1^\circ$ ) leaves were infiltrated with either 10 mM  $\text{MgCl}_2$  or *Psm* ( $\text{OD}_{600} = 0.005$ ) to induce SAR, and two days later, three upper leaves ( $2^\circ$ ) were challenge-infected with *Psm* ( $\text{OD}_{600} = 0.001$ ). Bacterial growth in upper leaves was assessed 3 days post  $2^\circ$  leaf-inoculation ( $n \geq 7$ ). Asterisks denote statistically significant differences between *Psm*-pre-treated and mock-control samples (\*\*\*:  $P < 0.001$ ; two-tailed *t* test). Seeds of *ics1 ics2* were sterilized and germinated on full MS medium containing 2 % sucrose (pH 5.7) before the seedlings were transferred to soil (Garcion et al., 2008).

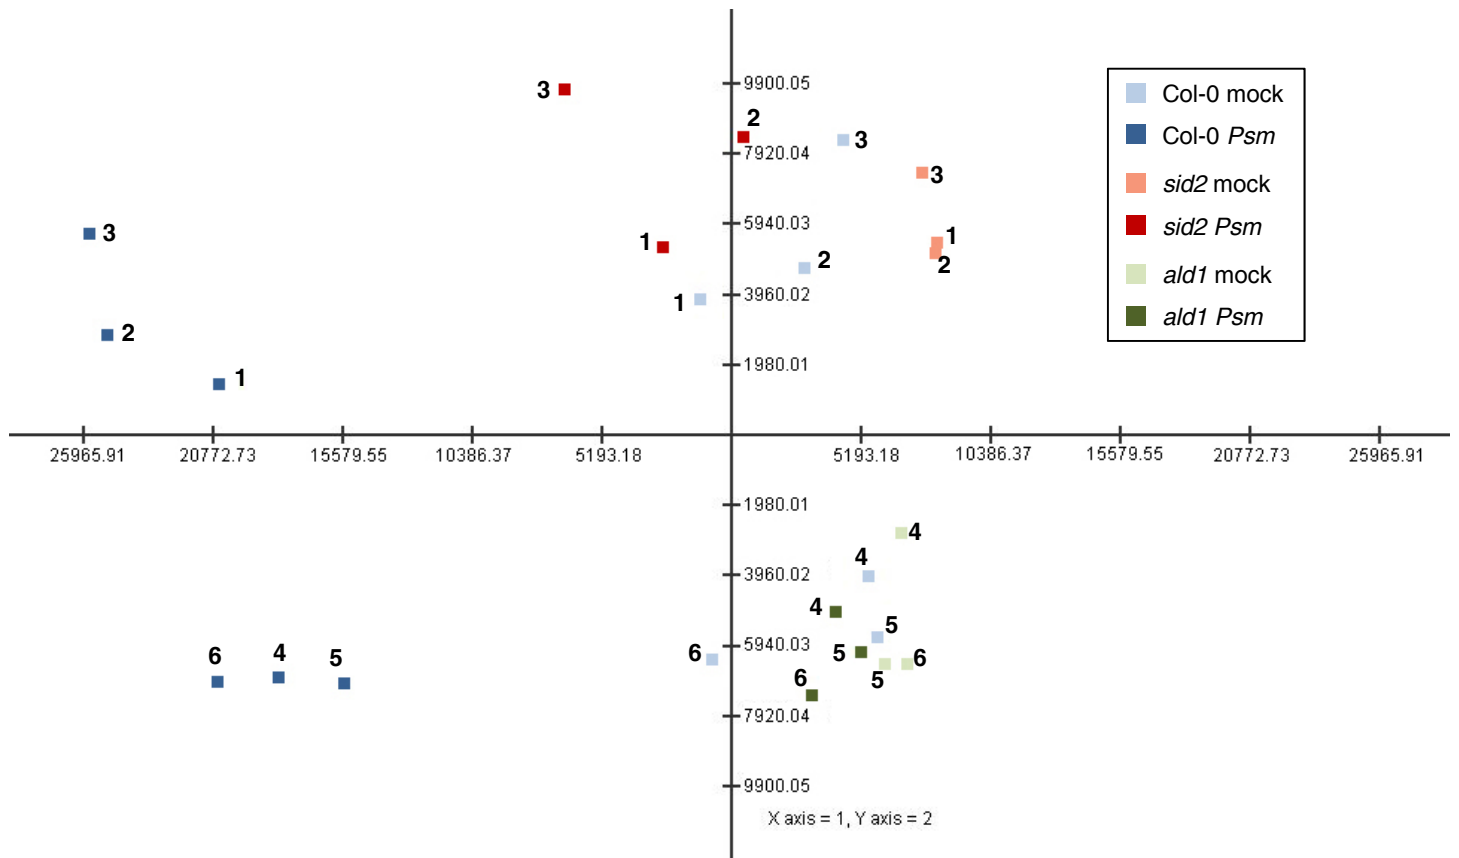

**Supplemental Figure 4.** Principle component analysis of the normalized transcriptome data; 1st dimension 58.0 % of variation; 2nd dimension 15.7 % of variation.

The principle component analysis of all samples indicates that 58.0 % of the variation is treatment variation which separates the *Psm*-inoculated from the mock-infiltrated samples. The wild-type has the farthest separation followed by *sid2*. The separation in *ald1* is virtually non-existent. The second dimension is environmental variation between the two sets of independent experiments (SAR experiments 1 to 3 vs. SAR experiments 4 to 6) and comprises only 15.7 % of variation.

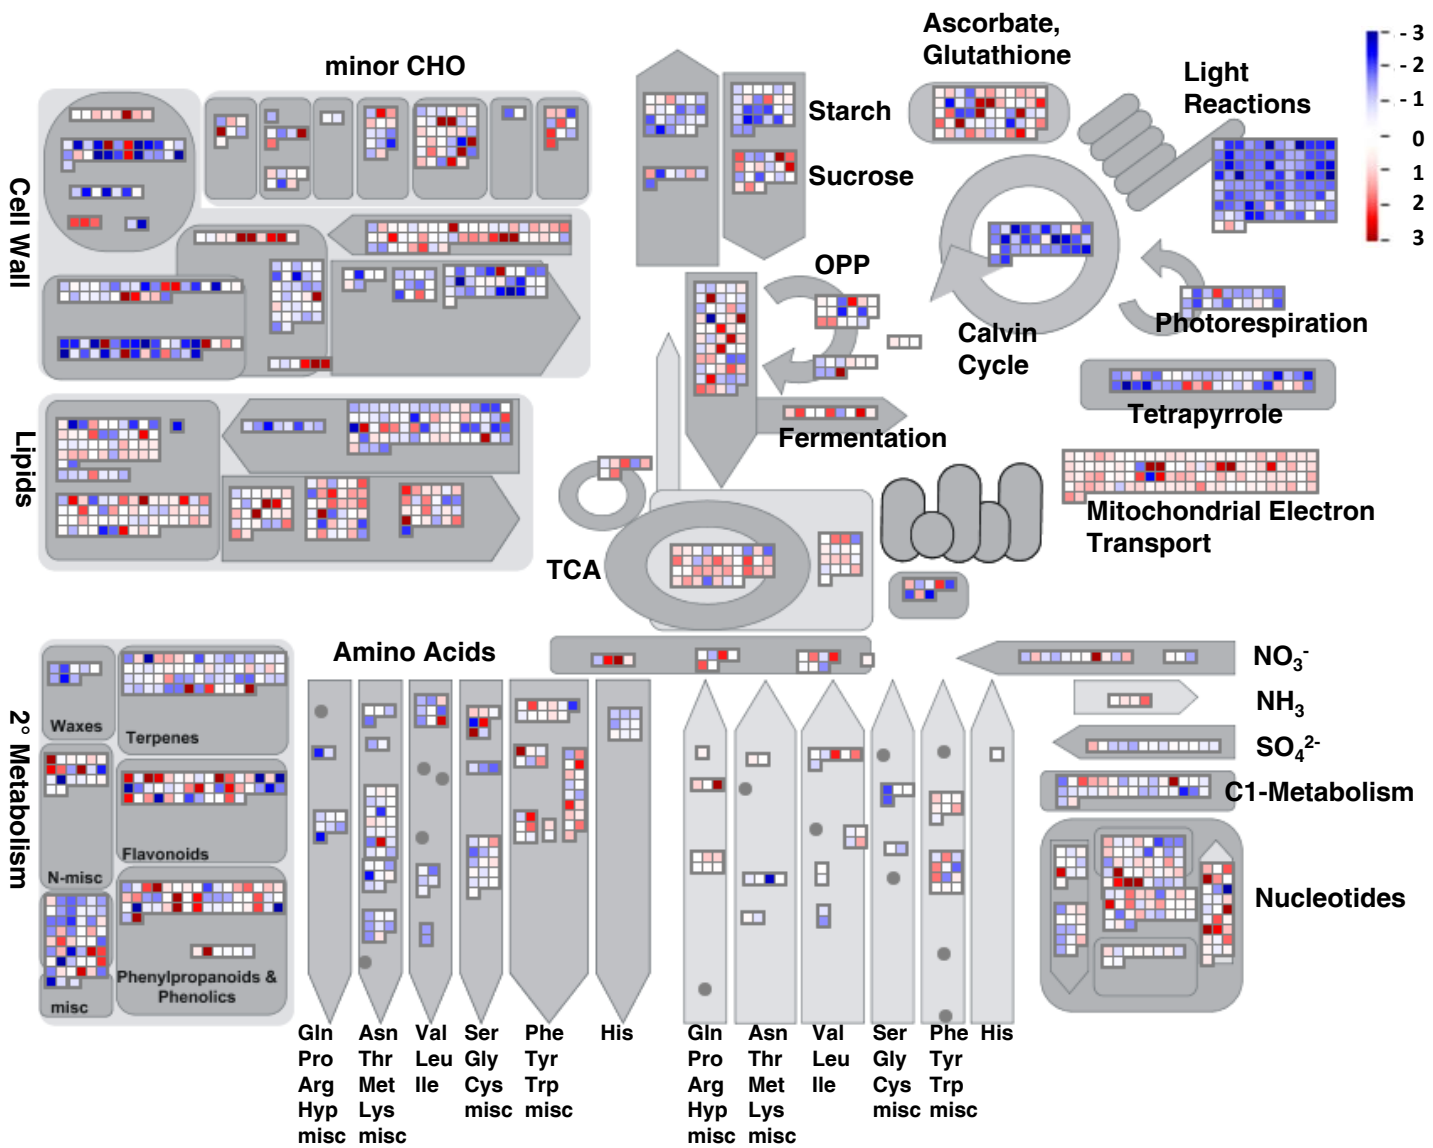

**Supplemental Figure 5.** MapMan visualization: the transcriptional SAR response in Col-0.

Overview of the changes in metabolism-related gene expression in distal (2°) leaves of Col-0 wild-type plants inoculated in 1° leaves with *Psm* (*P*) compared to Mock (*M*). Heat map representation indicates log<sub>2</sub> *P/M*-fold changes. Red (blue): Up-regulated (down-regulated) upon *Psm* inoculation.

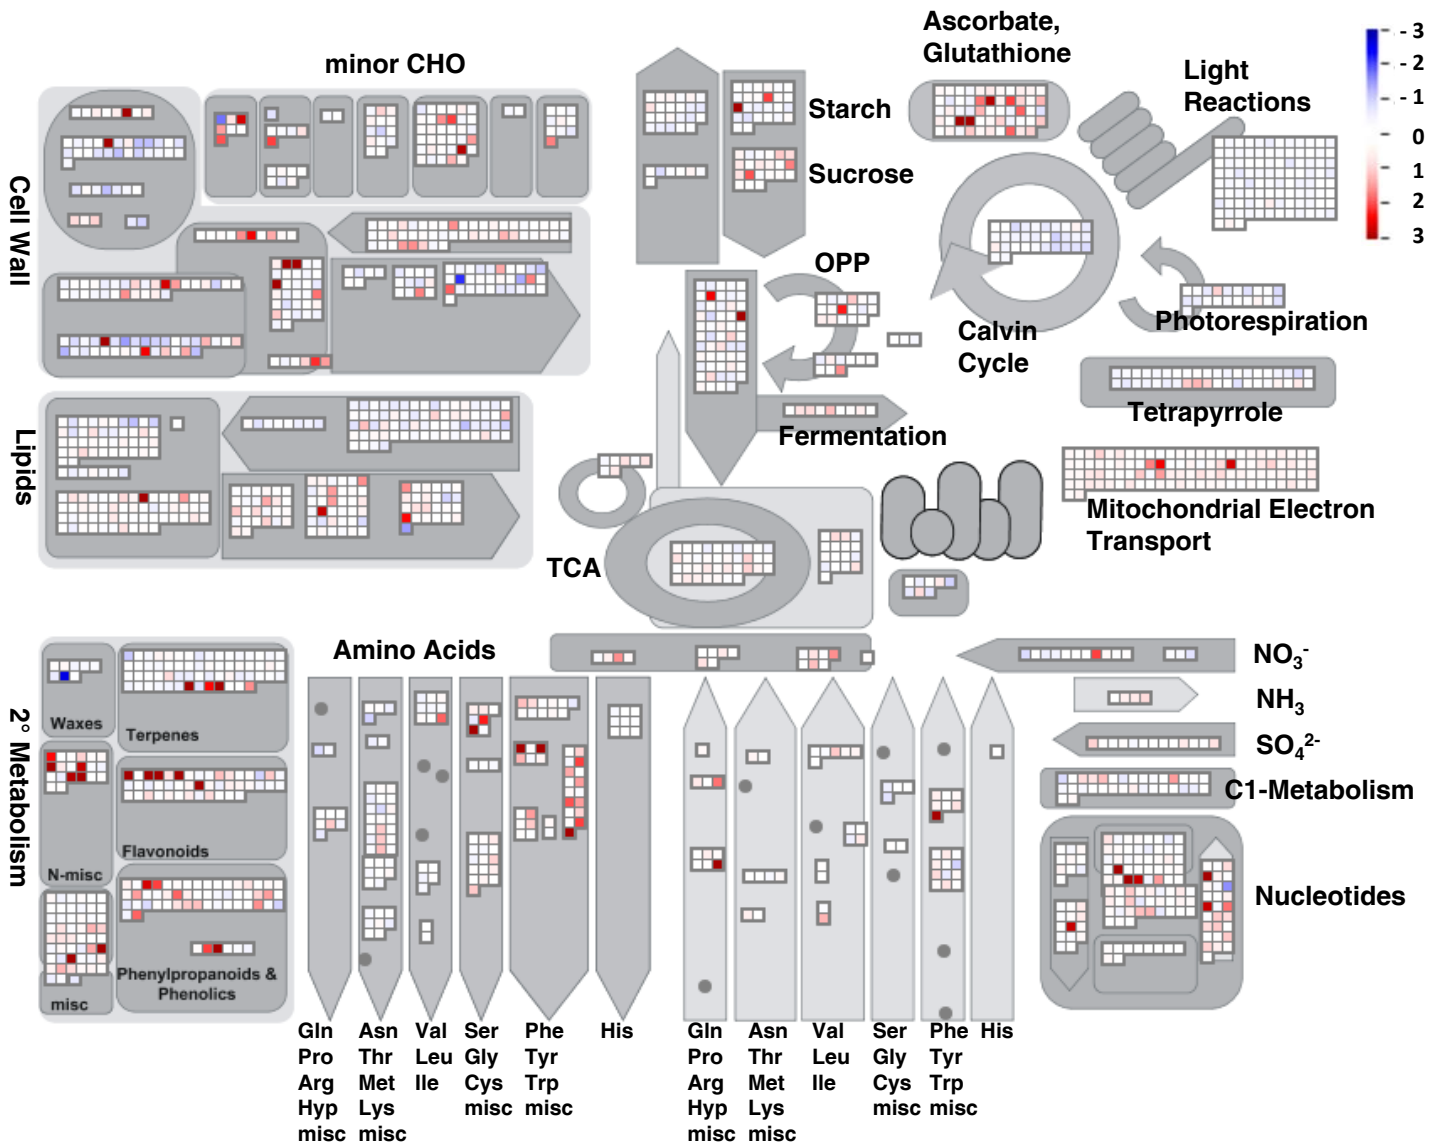

**Supplemental Figure 6.** MapMan visualization: a diminished transcriptional SAR response exists in *sid2*. Overview of the changes in metabolism-related gene expression in distal (2°) leaves of *sid2* plants inoculated in 1° leaves with *Psm* (*P*) compared to Mock (*M*). Heat map representation indicates log<sub>2</sub> *P/M*-fold changes. Red (blue): Up-regulated (down-regulated) upon *Psm* inoculation.

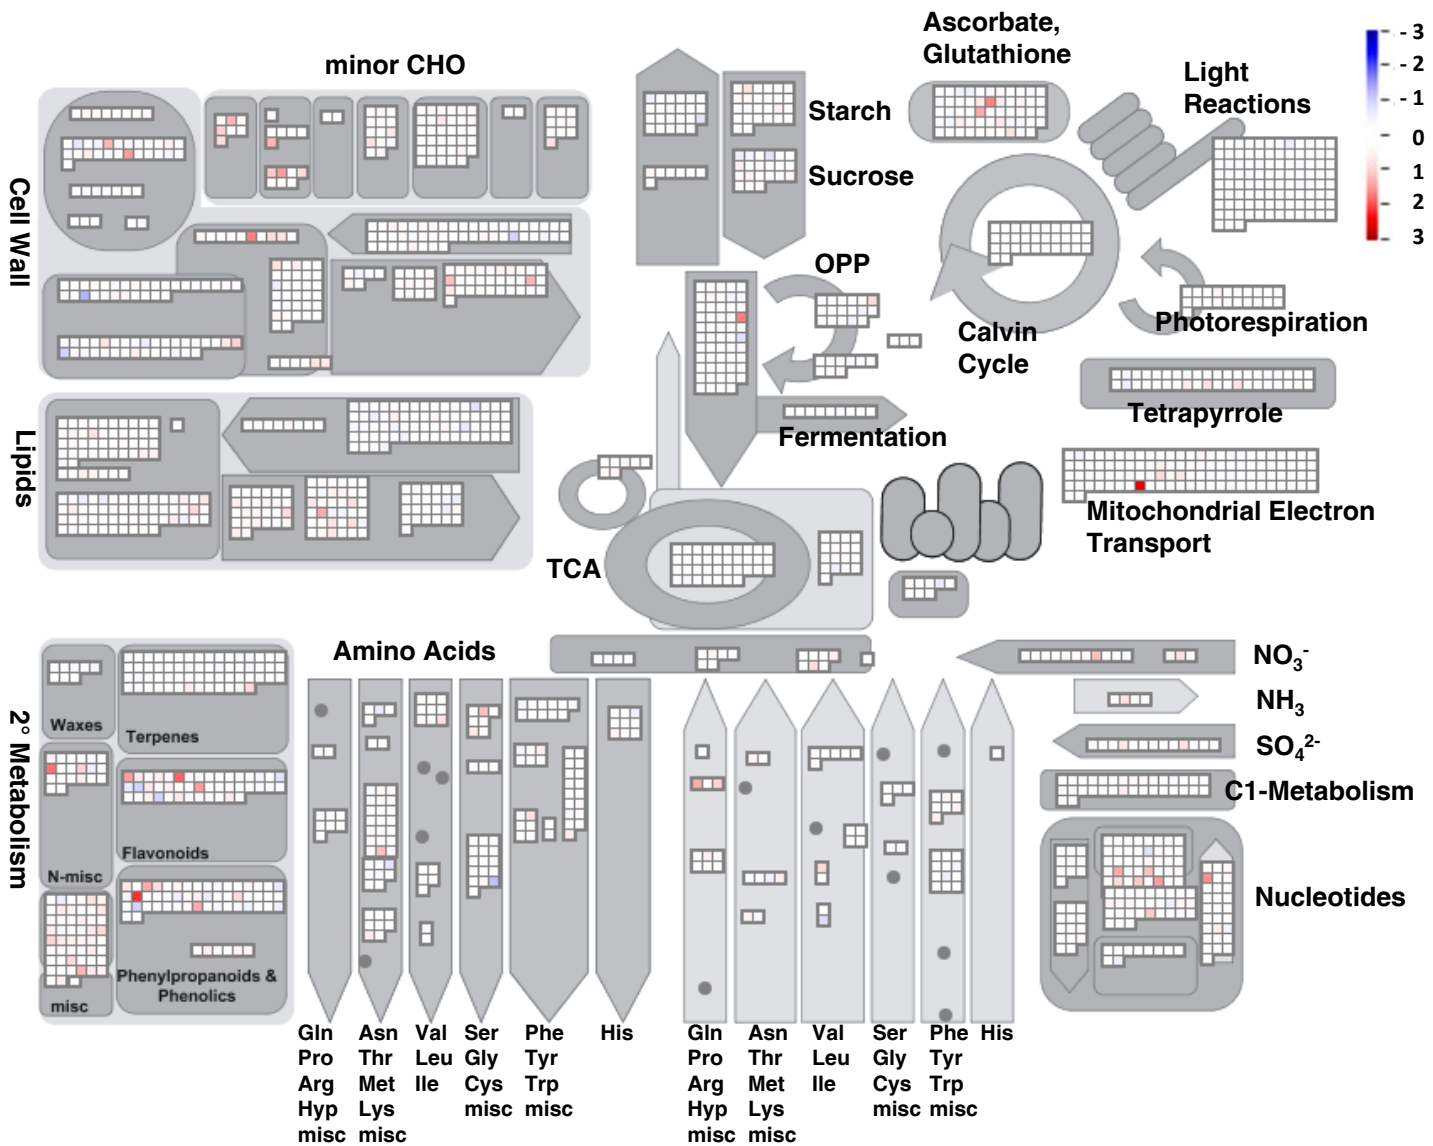

**Supplemental Figure 7.** MapMan visualization: the transcriptional SAR response is absent in *ald1*.

Overview of the changes in metabolism-related gene expression in distal (2°) leaves of *ald1* plants inoculated in 1° leaves with *Psm* (*P*) compared to Mock (*M*). Heat map representation indicates log<sub>2</sub> P/M-fold changes. Red (blue): Up-regulated (down-regulated) upon *Psm* inoculation.

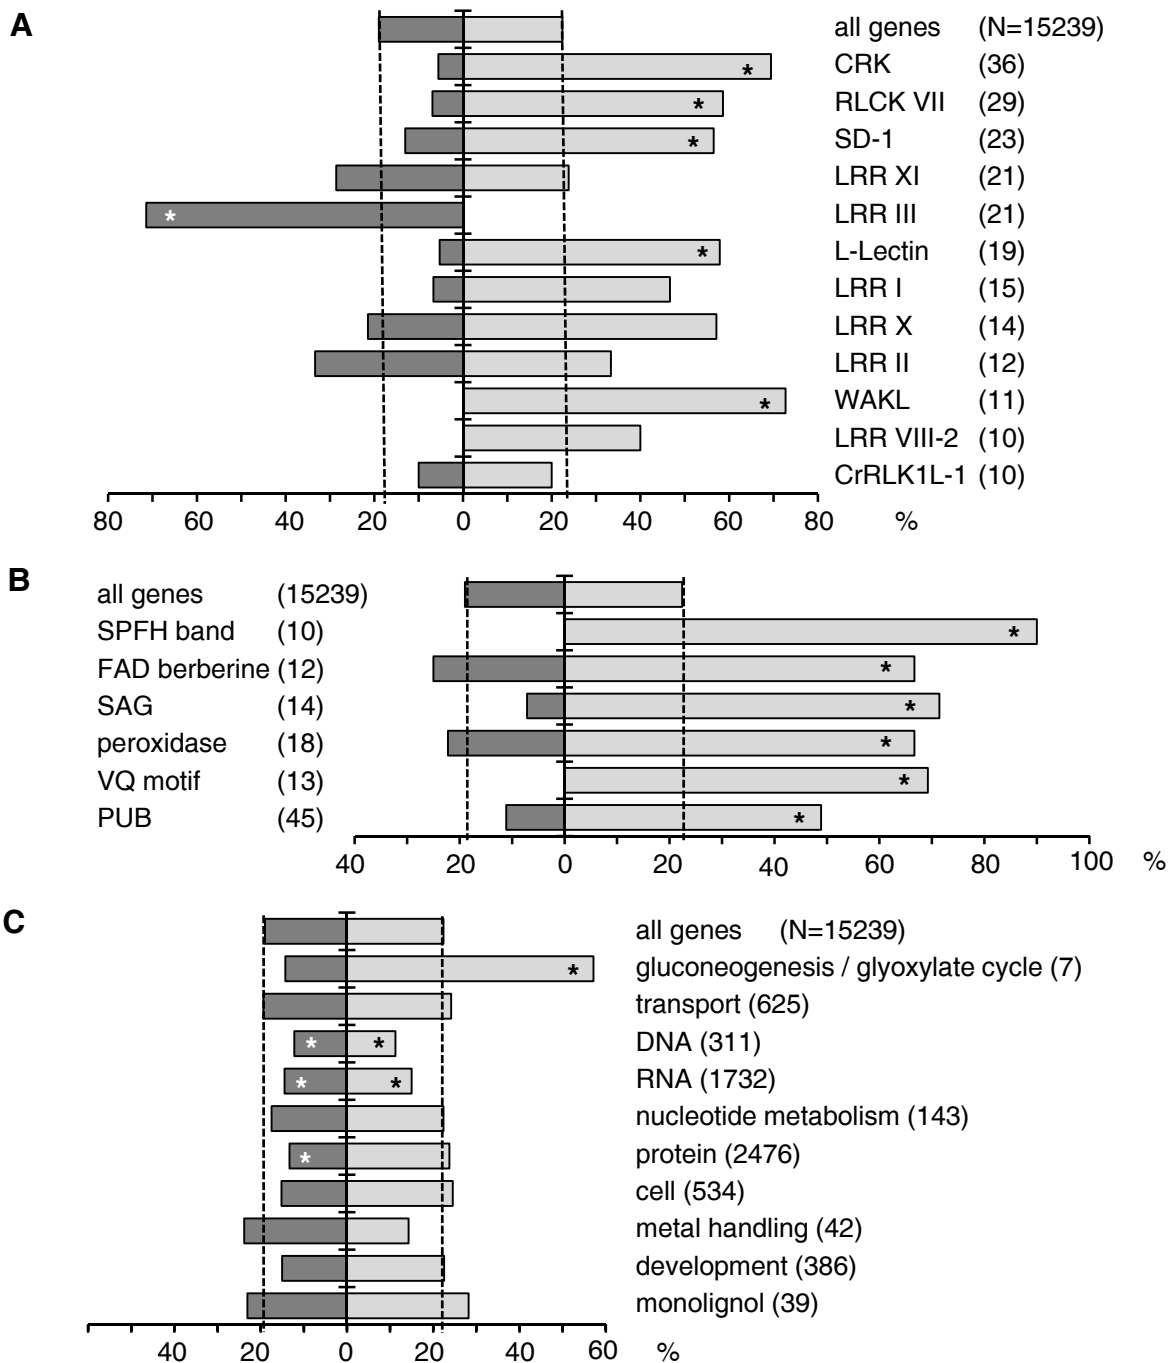

**Supplemental Figure 8.** Percentage of SAR<sup>+</sup> and SAR<sup>-</sup> genes in additional gene classes/families.

**(A)** Major subclasses of receptor-like protein kinases. Classification according to Shiu et al. Plant Cell (2004) 16: 1220-34. Only subclasses consisting of more than 10 genes were considered. CRK: cystein-rich protein kinases; RLCK: receptor-like cytoplasmic kinases; LRR: leucine rich repeat kinases; WAKL: wall-associated kinases.

**(B)** Further gene families enriched in SAR<sup>+</sup> genes. SPFH: stomatin/prohibitin/flotillin/HflK/C domain-containing genes; SAG: senescence-associated genes; FAD berberine: FAD berberine-type genes; VQ-motif: VQ motif-containing genes; PUB: plant U-box gene family.

**(C)** Other MapMan categories and gene families. Peroxidase: class III peroxidase gene family, Raes et al. Plant Physiol (2003) 133: 1051-71; monolignol: monolignol biosynthesis gene families, Tognolli et al. Gene (2002) 288: 129-38 (<http://www.arabidopsis.org/>).

Dashed vertical lines illustrate the percentage of SAR<sup>+</sup> and SAR<sup>-</sup> genes in the analyzed gene set (15239 genes). The number of genes in each category is given in brackets. Asterisks on right (left) bars indicate significant enrichment or depletion of gene categories in SAR<sup>+</sup> (SAR<sup>-</sup>) genes (Fisher's exact test,  $P < 0.01$ ).



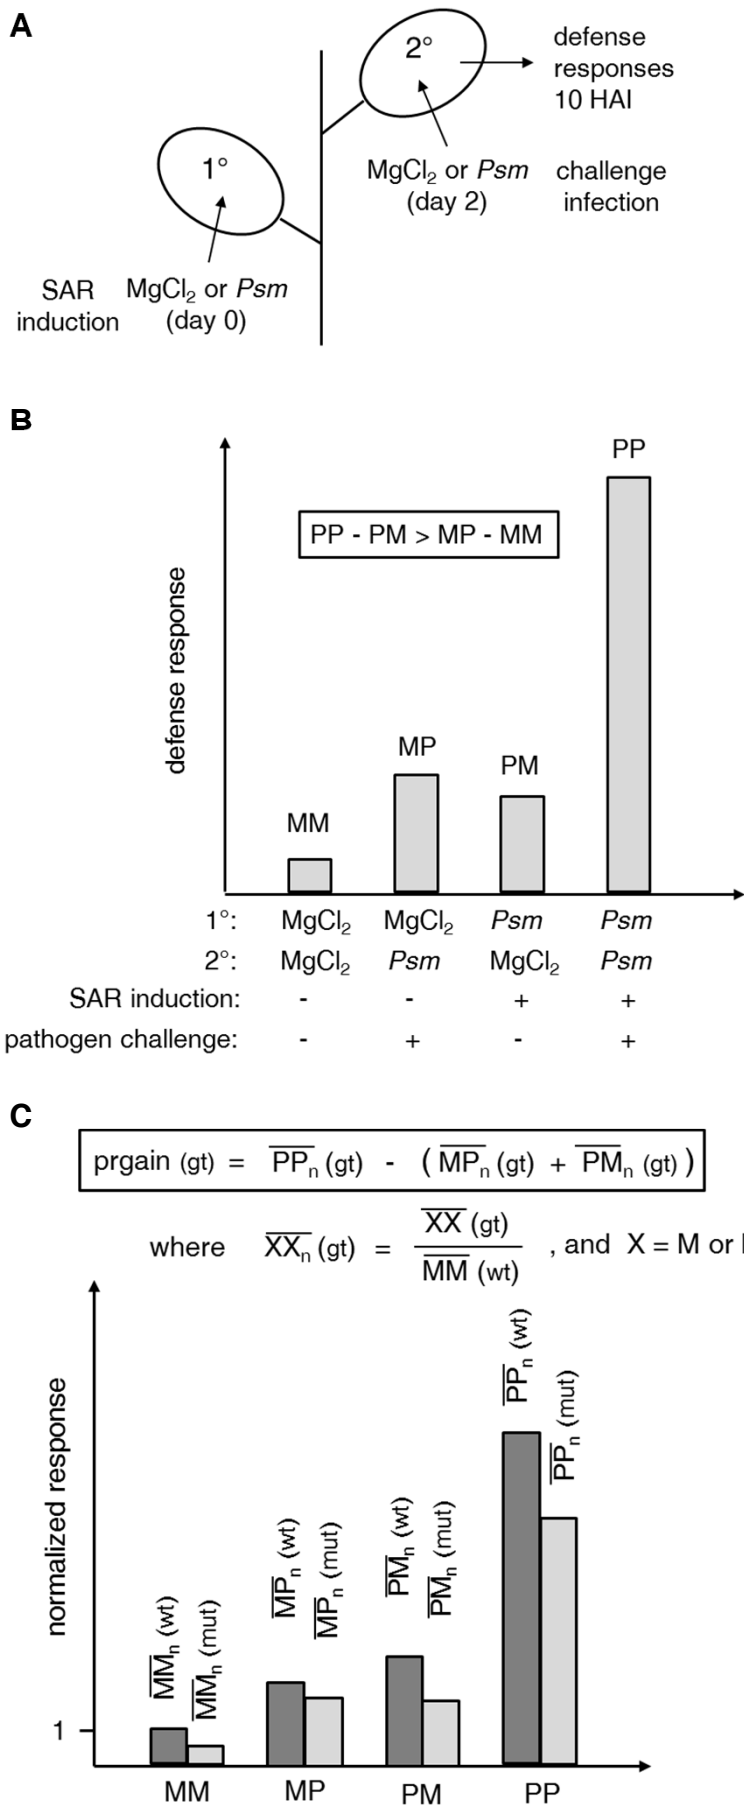

### Supplemental Figure 9.

SAR-associated defense priming – assay and definition.

**(A)** Experimental setup of the SAR priming assay.

At day 0, a SAR-inductive *Psm*- or a mock-control (MgCl<sub>2</sub>)-treatment was performed in 1° leaves. This was followed by a *Psm*-challenge or a mock-treatment of 2° leaves 48 h later. Defense responses (gene expression, metabolite analyses) in 2° leaves were assessed 10 h after the second treatment. All four possible combinations were compared: 1°-mock / 2°-mock (control state), 1°-*Psm* / 2°-mock (SAR induction, no pathogen challenge), 1°-mock / 2°-*Psm* (no SAR induction, pathogen challenge), and 1°-*Psm* / 2°-*Psm* (SAR induction and pathogen challenge).

**(B)** Definition of priming.

A particular defense response was defined as “primed”, if the differences between the (1°-*Psm* / 2°-*Psm*)- and the (1°-*Psm* / 2°-mock)-values were significantly larger than the differences between the (1°-mock / 2°-*Psm*)- and the (1°-mock / 2°-mock)-values, as determined by a two-sided Mann-Whitney U test ( $\alpha = 0.005$ ). Analogous definitions were used to assess the priming of pathogen- and SA-responses after exogenous Pip-treatment (Pip/*Psm* – Pip/mock > H<sub>2</sub>O/*Psm* – H<sub>2</sub>O/mock) and (Pip/SA – Pip/mock > H<sub>2</sub>O/SA – H<sub>2</sub>O/mock), respectively.

**(C)** Response gain due to priming.

To estimate quantitative differences between genotypes in the extent of priming of a response, we calculated the parameter “response gain due to priming” (prgain). The prgain-value reflects the gain of a response in a genotype if priming is activated.

$\overline{XX}(\text{gt})$ : mean of response values of a genotype (gt); X = M (Mock) or P (*Psm*).

$\overline{XX}_n(\text{gt})$ :  $\overline{XX}(\text{gt})$  normalized to  $\overline{MM}(\text{wt})$ , the mean of the wild-type (wt) mock/mock- values.

mut: mutant.

Note that the values of all genotypes are normalized to  $\overline{MM}(\text{wt})$ . Thus,  $\overline{MM}_n(\text{wt})$  of a dataset is always equal to 1.

The above description relates to biological SAR. The prgain-values for Pip-induced priming of *Psm*- or SA-responses were calculated analogously.

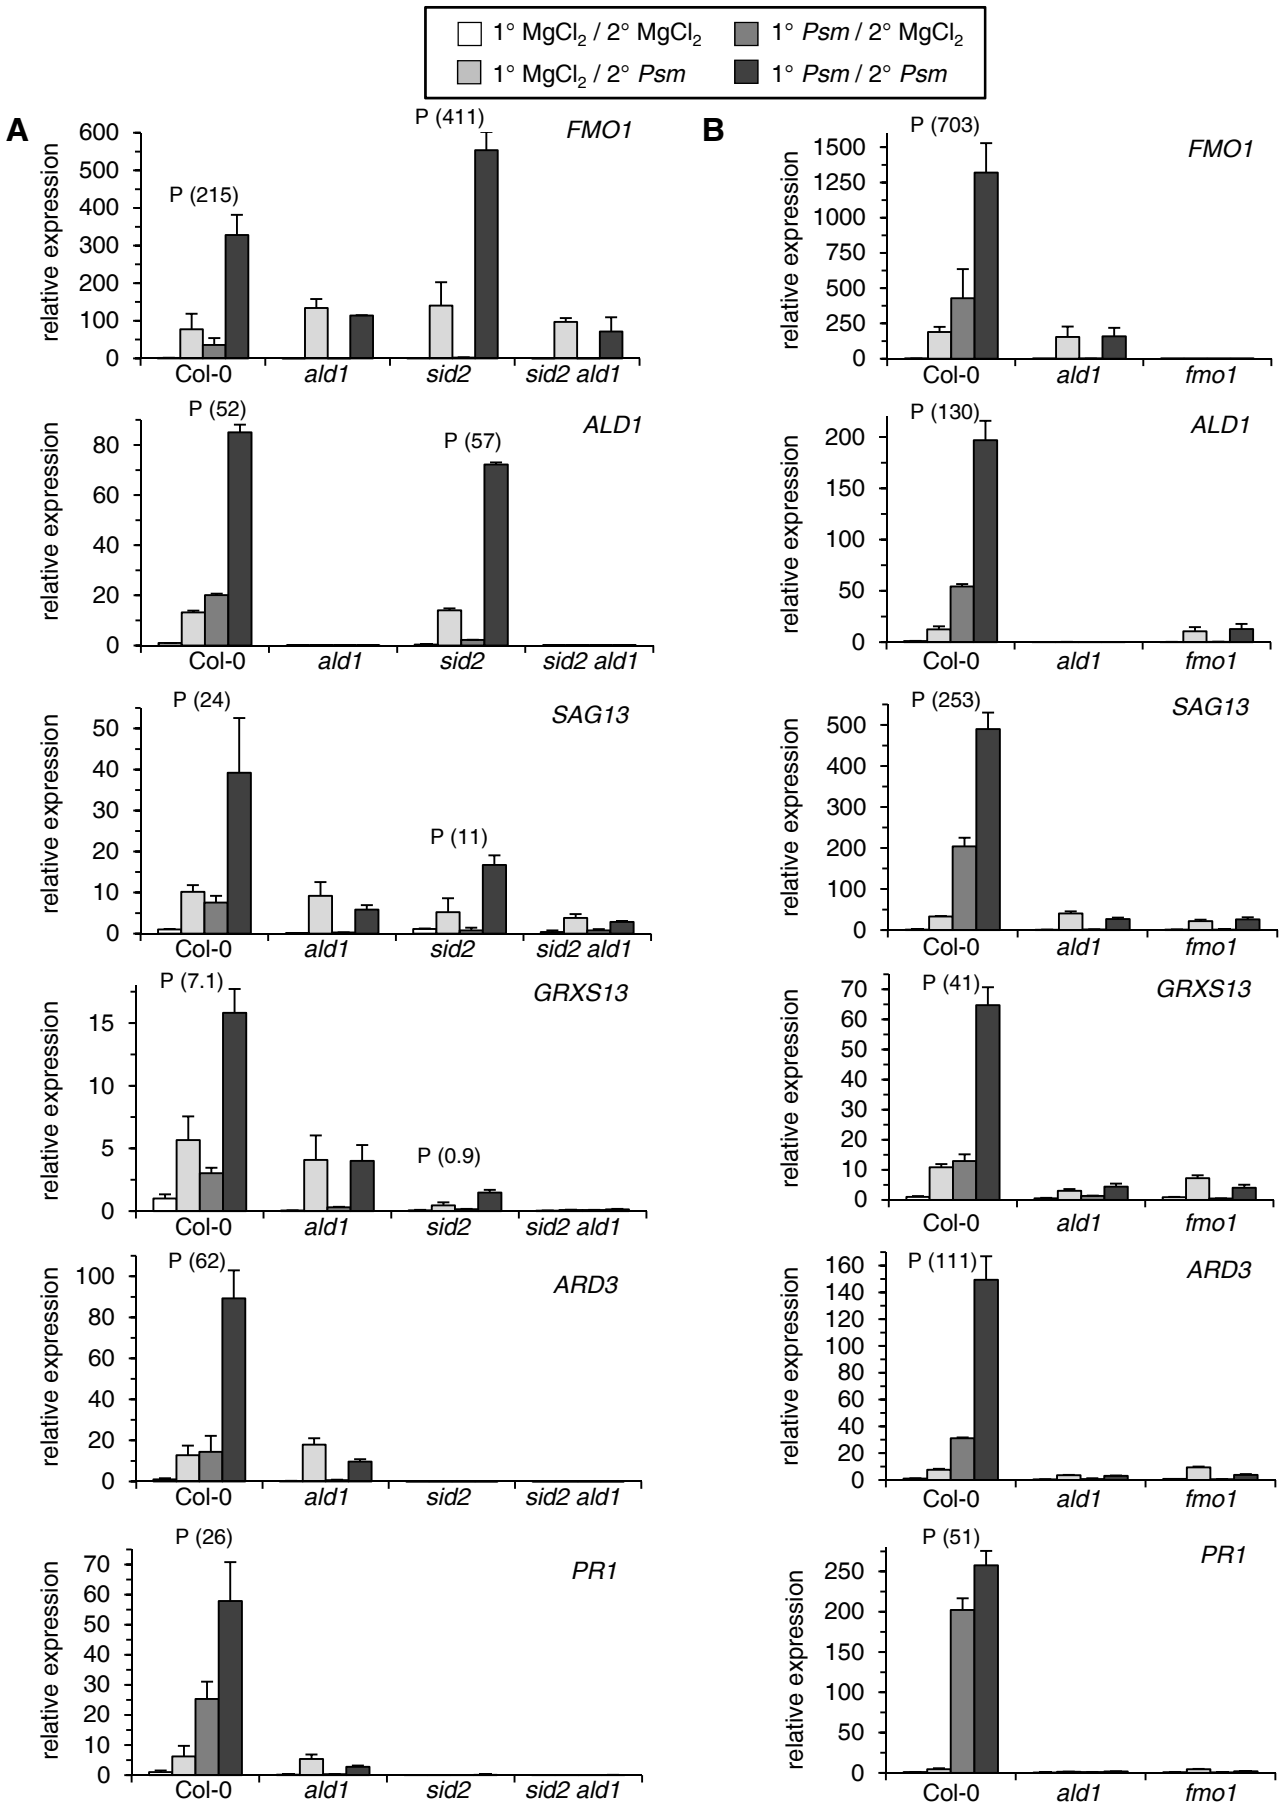

Supplemental Figure 10. Graphs of Figure 6 with a linear scale for the y-axes instead of a log-scale.

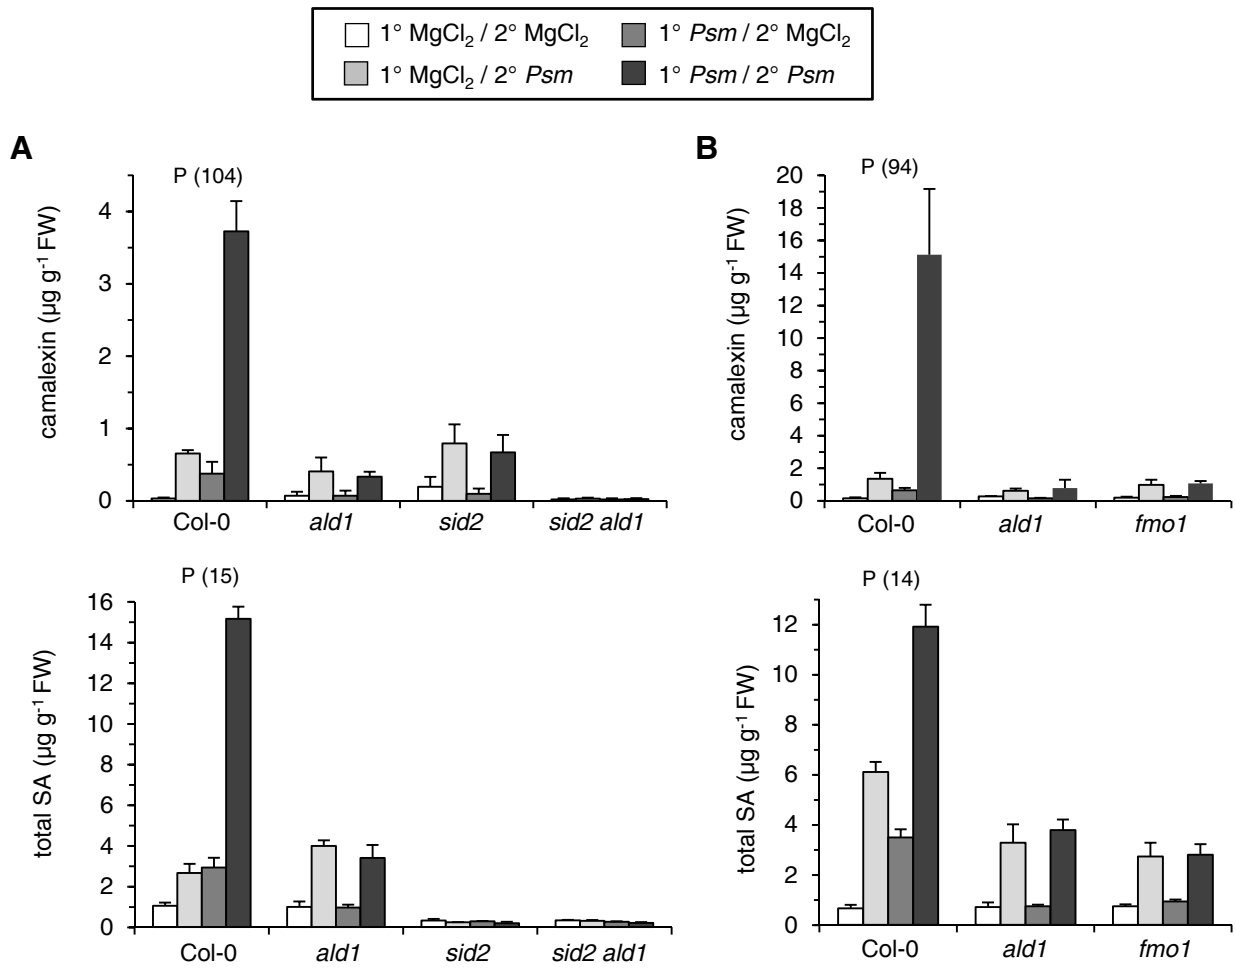

**Supplemental Figure 11.** Graphs of Figure 7 with a linear scale for the y-axes instead of a log-scale.

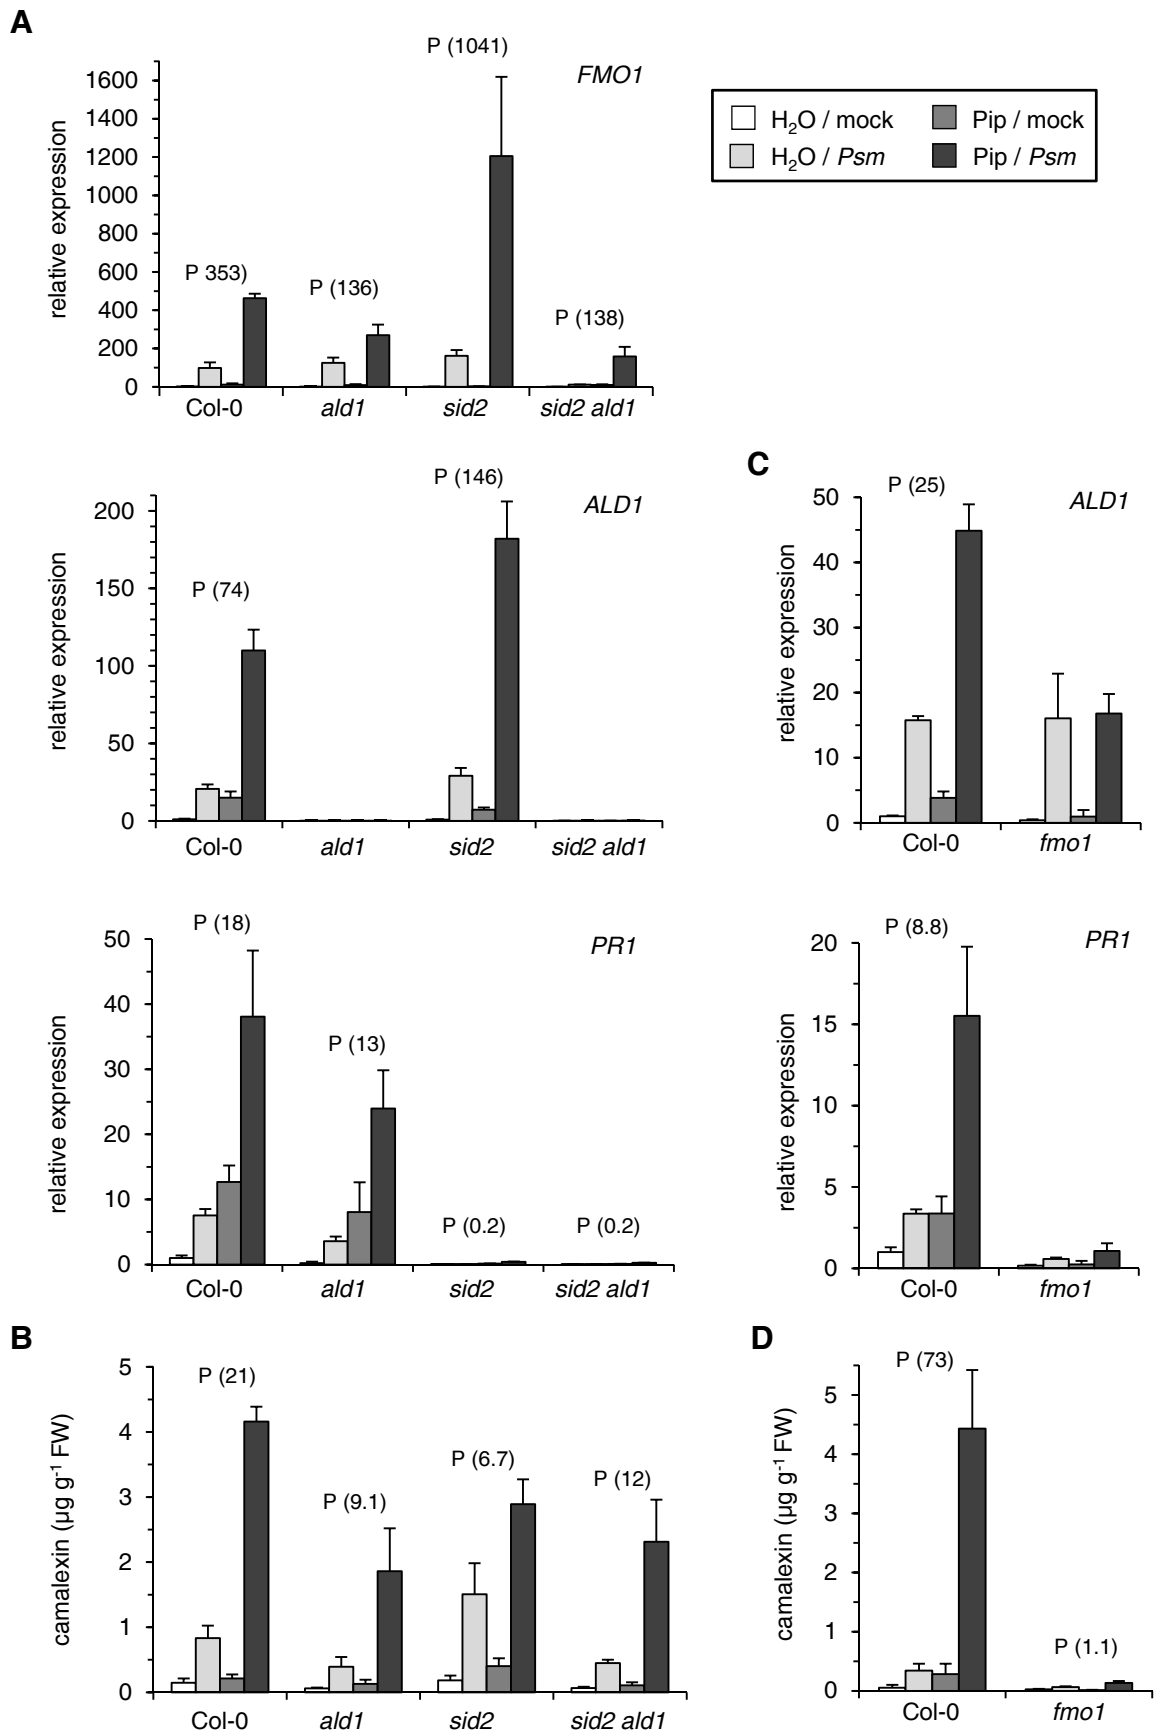

Supplemental Figure 12. Graphs of Figure 8 with a linear scale for the y-axes instead of a log-scale.

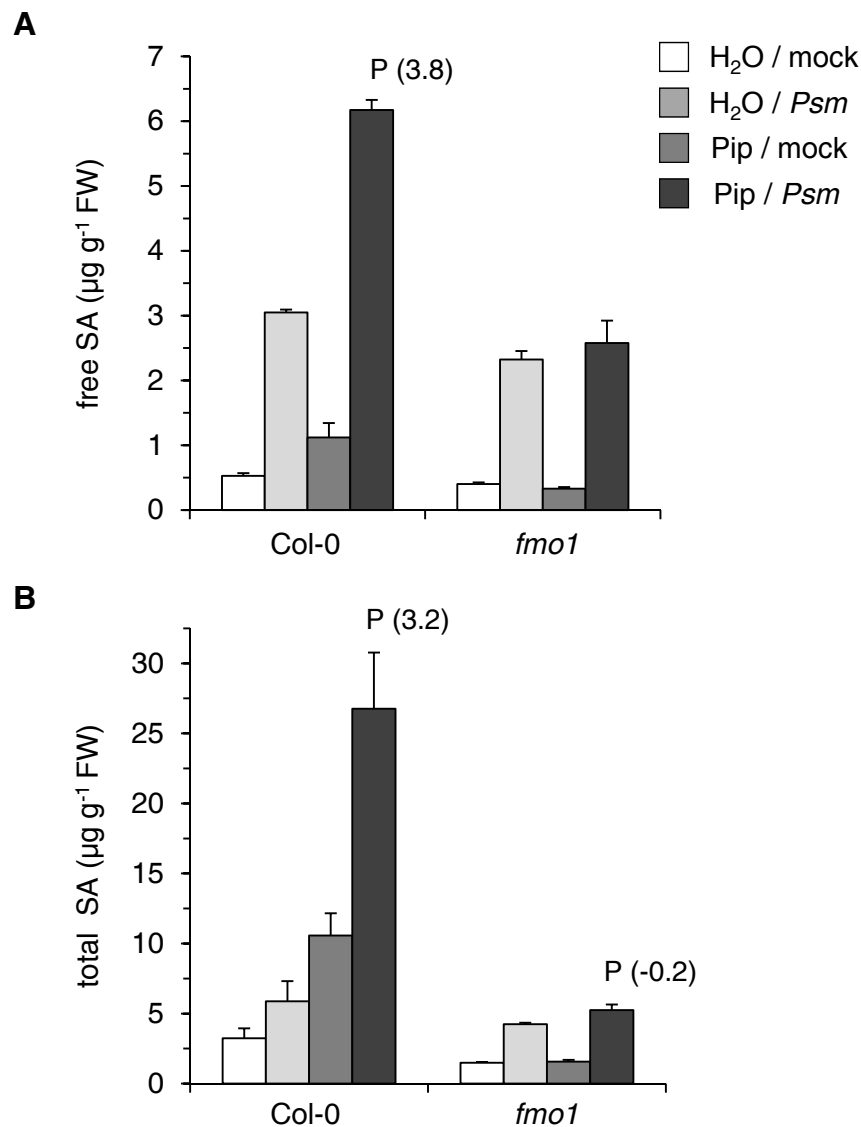

**Supplemental Figure 13.** Pip-induced priming of salicylic acid biosynthesis requires functional *FMO1*.

**(A)** free salicylic acid.

**(B)** total salicylic acid (sum of free and glycosidic SA).

Plants were supplied with 10 ml of 1 mM Pip ( $\equiv$  dose of 10  $\mu\text{mol}$ ) or with 10 ml of H<sub>2</sub>O (control treatment) via the root system, and leaves challenge-inoculated with *Psm* or mock-infiltrated one day later. Defense responses in leaves were assessed 10 h after the challenge treatment. Values represent the mean  $\pm$  SD of three biological replicates from different plants. Each biological replicate consists of six leaves from two plants. A “P” above the bars representing Pip/*Psm*-treatments indicates defense priming, as assessed in analogy to SAR priming (see Supplemental Figure 9B). As a measure of the gain of a response due to priming, we calculated the prgain (“response gain due to priming”) for each genotype with activated priming according to the formula given in Supplemental Figure 9C online. Prgain-values are given in brackets behind the priming indicator “P” and allow estimates about quantitative differences of the strength of priming between genotypes. The higher the prgain-value, the stronger the priming.

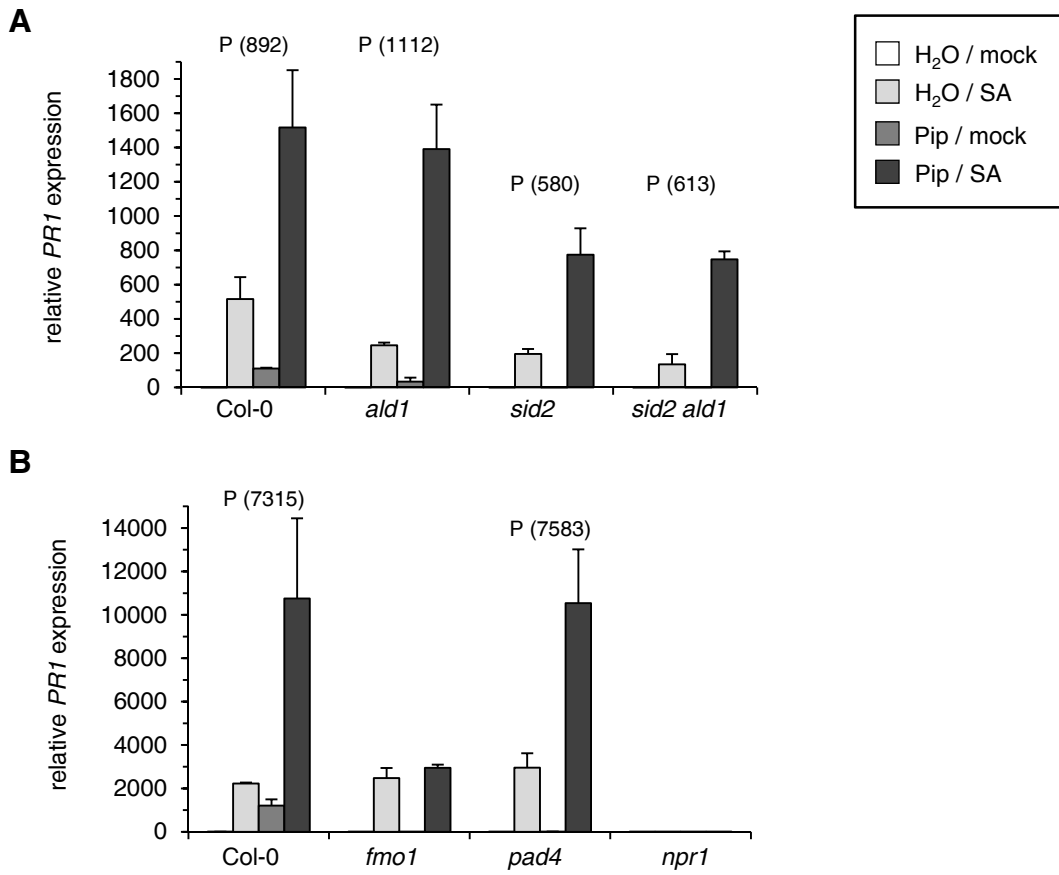

**Supplemental Figure 14.** Graphs of Figures 9A and 9B with a linear scale for the y-axes instead of a log-scale.

|           |           |                |                                            | mean expression value                      |     |             |     |             |    | fold-change (log <sub>2</sub> ) |             |             |     |
|-----------|-----------|----------------|--------------------------------------------|--------------------------------------------|-----|-------------|-----|-------------|----|---------------------------------|-------------|-------------|-----|
|           | AGI       | name           | function                                   | Col-0                                      |     | <i>sid2</i> |     | <i>ald1</i> |    | Col-0                           | <i>sid2</i> | <i>ald1</i> |     |
|           |           |                |                                            | M                                          | P   | M           | P   | M           | P  | P/M                             | P/M         | P/M         |     |
| <b>A</b>  | At1g57630 | -              | TIR-NBS-LRR protein                        | 6                                          | 256 | 1           | 56  | 2           | 3  | 5.1*                            | 4.9*        | 0.4         |     |
|           | At1g66090 | -              | TIR-NBS protein                            | 10                                         | 212 | 4           | 21  | 9           | 26 | 4.3*                            | 2.1*        | 1.4         |     |
|           | At4g11170 | <i>RMG1</i>    | TIR-NBS-LRR protein                        | 1                                          | 34  | 0           | 2   | 0           | 1  | 4.1*                            | 1.4*        | 0.7         |     |
|           | At5g41750 | -              | TIR-NBS-LRR protein                        | 24                                         | 293 | 6           | 27  | 10          | 67 | 3.5*                            | 2.1*        | 2.6         |     |
|           | At5g46520 | <i>VICTR</i>   | TIR-NBS-LRR protein                        | 8                                          | 57  | 4           | 12  | 6           | 9  | 2.7*                            | 1.5         | 0.5         |     |
| <b>B</b>  | At4g23210 | <i>CRK13</i>   | cysteine-rich protein kinase               | 7                                          | 174 | 2           | 26  | 0           | 2  | 4.5*                            | 3.1*        | 1.1         |     |
|           | At4g04500 | <i>CRK37</i>   | cysteine-rich protein kinase               | 12                                         | 275 | 3           | 35  | 1           | 1  | 4.4*                            | 3.1*        | 0.2         |     |
|           | At1g51890 | -              | receptor-like protein kinase               | 6                                          | 221 | 0           | 13  | 2           | 3  | 5.0*                            | 3.4*        | 0.7         |     |
|           | At1g51800 | <i>IOS1</i>    | receptor-like protein kinase               | 7                                          | 88  | 1           | 6   | 1           | 2  | 3.5*                            | 2.0*        | 0.3         |     |
|           | At4g33430 | <i>BAK1</i>    | receptor-like protein kinase               | 32                                         | 140 | 23          | 34  | 25          | 26 | 2.1*                            | 0.6         | 0.0         |     |
|           | At5g20480 | <i>EFR</i>     | receptor-like protein kinase               | 6                                          | 28  | 6           | 10  | 2           | 1  | 2.0*                            | 0.6         | -0.6        |     |
|           | At3g21630 | <i>CERK1</i>   | receptor-like protein kinase               | 33                                         | 112 | 21          | 36  | 20          | 24 | 1.7*                            | 0.7         | 0.2         |     |
|           | At4g46330 | <i>FLS2</i>    | receptor-like protein kinase               | 19                                         | 17  | 11          | 7   | 17          | 19 | -0.1                            | -0.6        | 0.2         |     |
|           | <b>C</b>  | At1g01560      | <i>MPK11</i>                               | MAP kinase                                 | 7   | 193         | 1   | 16          | 1  | 3                               | 4.5*        | 3.1*        | 0.7 |
|           |           | At3g45640      | <i>MPK3</i>                                | MAP kinase                                 | 109 | 601         | 70  | 152         | 75 | 138                             | 2.5*        | 1.1         | 0.9 |
| At2g43790 |           | <i>MPK6</i>    | MAP kinase                                 | 43                                         | 118 | 34          | 41  | 43          | 50 | 1.5*                            | 0.3         | 0.2         |     |
| At4g29810 |           | <i>MKK2</i>    | MAP kinase kinase                          | 65                                         | 363 | 41          | 112 | 27          | 33 | 2.5*                            | 1.4*        | 0.3         |     |
| At4g01370 |           | <i>MKK4</i>    | MAP kinase kinase                          | 68                                         | 277 | 57          | 111 | 41          | 43 | 2.0*                            | 0.9         | 0.1         |     |
| At3g46930 |           | <i>Raf43</i>   | MAP kinase kinase kinase                   | 4                                          | 37  | 3           | 8   | 2           | 6  | 3.0*                            | 1.1         | 1.1         |     |
| At5g66850 |           | <i>MAPKKK5</i> | MAP kinase kinase kinase                   | 32                                         | 178 | 23          | 28  | 29          | 34 | 2.4*                            | 0.2         | 0.2         |     |
| <b>D</b>  |           | At1g76040      | <i>CPK29</i>                               | Ca <sup>2+</sup> -dependent protein kinase | 14  | 295         | 6   | 47          | 5  | 13                              | 4.3*        | 2.8*        | 1.2 |
|           | At1g18890 | <i>CPK1</i>    | Ca <sup>2+</sup> -dependent protein kinase | 33                                         | 256 | 21          | 48  | 22          | 31 | 2.9*                            | 1.2         | 0.4         |     |
|           | At4g35310 | <i>CPK5</i>    | Ca <sup>2+</sup> -dependent protein kinase | 23                                         | 126 | 13          | 30  | 19          | 28 | 2.4*                            | 1.2         | 0.5         |     |
| <b>E</b>  | At1g80840 | <i>WRKY40</i>  | WRKY transcription factor                  | 4                                          | 169 | 2           | 11  | 3           | 46 | 5.0*                            | 2.1*        | 3.4         |     |
|           | At5g13080 | <i>WRKY75</i>  | WRKY transcription factor                  | 1                                          | 50  | 0           | 2   | 1           | 0  | 4.9*                            | 1.4*        | -0.1        |     |
|           | At5g64810 | <i>WRKY51</i>  | WRKY transcription factor                  | 3                                          | 107 | 0           | 4   | 1           | 1  | 4.8*                            | 2.2*        | 0.1         |     |
|           | At2g46400 | <i>WRKY46</i>  | WRKY transcription factor                  | 18                                         | 419 | 5           | 79  | 6           | 23 | 4.4*                            | 3.7*        | 1.7         |     |
|           | At4g23810 | <i>WRKY53</i>  | WRKY transcription factor                  | 8                                          | 162 | 1           | 8   | 2           | 23 | 4.2*                            | 2.0*        | 2.9         |     |
|           | At4g31800 | <i>WRKY18</i>  | WRKY transcription factor                  | 15                                         | 233 | 6           | 15  | 4           | 16 | 3.8*                            | 1.2         | 1.7         |     |
|           | At5g46350 | <i>WRKY8</i>   | WRKY transcription factor                  | 3                                          | 46  | 1           | 5   | 2           | 2  | 3.7*                            | 1.5*        | 0.2         |     |
| <b>F</b>  | At3g44350 | <i>NAC061</i>  | NAC transcription factor                   | 2                                          | 69  | 0           | 6   | 0           | 1  | 4.5*                            | 2.3*        | 0.2         |     |
|           | At5g22380 | <i>NAC090</i>  | NAC transcription factor                   | 4                                          | 86  | 0           | 10  | 0           | 4  | 4.1*                            | 3.1*        | 1.6         |     |
|           | At2g43000 | <i>NAC042</i>  | NAC transcription factor                   | 3                                          | 57  | 0           | 4   | 1           | 1  | 3.9*                            | 1.8*        | -0.1        |     |
| <b>G</b>  | At1g22070 | <i>TGA3</i>    | TGA transcription factor                   | 29                                         | 150 | 27          | 60  | 12          | 16 | 2.3*                            | 1.1         | 0.4         |     |
|           | At5g06960 | <i>TGA5</i>    | TGA transcription factor                   | 10                                         | 50  | 7           | 14  | 11          | 13 | 2.2*                            | 0.9         | 0.2         |     |
|           | At5g65210 | <i>TGA1</i>    | TGA transcription factor                   | 12                                         | 40  | 12          | 14  | 8           | 9  | 1.6*                            | 0.3         | 0.3         |     |
| <b>H</b>  | At1g64280 | <i>NPR1</i>    | transcriptional coactivator                | 39                                         | 121 | 31          | 55  | 20          | 26 | 1.6*                            | 0.8         | 0.3         |     |
|           | At5g45110 | <i>NPR3</i>    | NPR1-like protein 3                        | 25                                         | 234 | 16          | 31  | 6           | 14 | 3.2*                            | 1.0         | 1.0         |     |
|           | At4g19660 | <i>NPR4</i>    | NPR1-like protein 4                        | 32                                         | 85  | 26          | 36  | 6           | 6  | 1.4*                            | 0.5         | 0.0         |     |

**Supplemental Figure 15.** The transcriptional SAR response: activation of multiple stages of defense signaling. Expression values of selected genes.

Selected genes among **(A)** resistance proteins, **(B)** receptor-like protein kinases, **(C)** MAP kinase cascade members, **(D)** calcium-dependent protein kinases, **(E)** WRKY transcription factors, **(F)** NAC transcription factors, **(G)** TGA transcription factors, and **(H)** NPR1 and paralogues.

The mean of the expression values of the RNA-seq analyses are depicted. Samples originate from distal leaves of *Psm* (*P*)-inoculated or mock (*M*)-treated Col-0, *sid2*, or *ald1* plants at 48 HAI. Log<sub>2</sub>-transformed *P/M*-ratios (fold-changes) are depicted, and asterisks indicate significant changes (FDR < 0.01). The log<sub>2</sub> *P/M*-ratios are highlighted according to their values as follows:

|                             |       |            |            |            |            |             |              |              |        |
|-----------------------------|-------|------------|------------|------------|------------|-------------|--------------|--------------|--------|
| log <sub>2</sub> <i>P/M</i> | ≥ 5.0 | 4.9 to 4.0 | 3.9 to 3.0 | 2.9 to 2.0 | 1.9 to 1.0 | 0.9 to -0.9 | -1.0 to -1.9 | -2.0 to -2.9 | ≤ -3.0 |
|-----------------------------|-------|------------|------------|------------|------------|-------------|--------------|--------------|--------|

| (A) | Experiment | Treatment1 | Treatment2 | Phenotype |
|-----|------------|------------|------------|-----------|
| A   | Mock       | Mock       | Mock       | 1.56      |
| A   | Mock       | Mock       | Mock       | 0.46      |
| A   | Mock       | Mock       | Mock       | 0.97      |
| A   | Mock       | Psm        | Psm        | 27.21     |
| A   | Mock       | Psm        | Psm        | 147.60    |
| A   | Mock       | Psm        | Psm        | 57.77     |
| A   | Psm        | Mock       | Mock       | 57.09     |
| A   | Psm        | Mock       | Mock       | 37.48     |
| A   | Psm        | Mock       | Mock       | 11.89     |
| A   | Psm        | Psm        | Psm        | 303.08    |
| A   | Psm        | Psm        | Psm        | 402.47    |
| A   | Psm        | Psm        | Psm        | 278.32    |
| B   | Mock       | Mock       | Mock       | 1.56      |
| B   | Mock       | Mock       | Mock       | 1.14      |
| B   | Mock       | Mock       | Mock       | 0.31      |
| B   | Mock       | Psm        | Psm        | 239.44    |
| B   | Mock       | Psm        | Psm        | 152.13    |
| B   | Mock       | Psm        | Psm        | 176.21    |
| B   | Psm        | Mock       | Mock       | 241.64    |
| B   | Psm        | Mock       | Mock       | 328.27    |
| B   | Psm        | Mock       | Mock       | 716.20    |
| B   | Psm        | Psm        | Psm        | 1238.10   |
| B   | Psm        | Psm        | Psm        | 1116.76   |
| B   | Psm        | Psm        | Psm        | 1606.59   |
| C   | Mock       | Mock       | Mock       | 0.94      |
| C   | Mock       | Mock       | Mock       | 0.90      |
| C   | Mock       | Mock       | Mock       | 1.16      |
| C   | Mock       | Psm        | Psm        | 137.05    |
| C   | Mock       | Psm        | Psm        | 186.87    |
| C   | Mock       | Psm        | Psm        | 234.39    |
| C   | Psm        | Mock       | Mock       | 17.70     |
| C   | Psm        | Mock       | Mock       | 28.02     |
| C   | Psm        | Mock       | Mock       | 19.39     |
| C   | Psm        | Psm        | Psm        | 740.93    |
| C   | Psm        | Psm        | Psm        | 455.76    |
| C   | Psm        | Psm        | Psm        | 531.36    |

| ANOVA results                    | SumSq   | Df | F value | Pr(>F)                 |
|----------------------------------|---------|----|---------|------------------------|
| Treatment1                       | 1270647 | 1  | 93.0036 | 9.93*10 <sup>-10</sup> |
| Treatment2                       | 1197332 | 1  | 87.6374 | 1.76*10 <sup>-09</sup> |
| Experiment                       | 923292  | 2  | 33.7897 | 1.05*10 <sup>-07</sup> |
| Treatment1:Treatment2            | 415170  | 1  | 30.3879 | 1.14*10 <sup>-05</sup> |
| Treatment1:Experiment            | 739373  | 2  | 27.0588 | 7.07*10 <sup>-07</sup> |
| Treatment2:Experiment            | 189701  | 2  | 6.9425  | 0.004178               |
| Treatment1:Treatment2:Experiment | 93249   | 2  | 3.4126  | 0.04962                |
| Residuals                        | 327896  | 24 |         |                        |

**Supplemental Table 1.** Linear model-based analysis of the SAR-associated priming response in Col-0 plants to estimate treatment and experimental effect terms.

**(A) Phenotype:** relative *FMO1* transcript levels.

An analysis of variance (ANOVA) was performed with the depicted data (“object1”) from three independent experiments (A, B, and C), each consisting of three biological replicate samples per treatment type, using the R statistical package and the command:

“Anova(lm(Phenotype~Treatment1+Treatment2+Experiment+Treatment1\*Treatment2+Treatment1\*Experiment+Treatment2\*Experiment+Treatment1\*Treatment2\*Experiment, data=object1),type=2)”.

SAR priming was assessed as described in Fig. 6 and Supplemental Fig. 11.

Treatment1: effect term for treatment of 1° leaves (Mock or *Psm*); Treatment2: effect term for the subsequent treatment of 2° leaves (Mock or *Psm*).

Treatment1\*Treatment2: effect term for the interaction of treatments (“Priming”).

Experiment: Term reflecting variation between experiments; Experiment\*Treatmentx: Term reflecting experimental impact on effect of treatment x; Experiment\*Treatment1\*Treatment2: Term reflecting experimental influence on treatment interaction.

SumSq: type II-sum of squares. Df: degrees of freedom. Pr(>F): P-value associated with a corresponding F value.



| (B)                              | Experiment | Treatment1 | Treatment2 | Phenotype |    |         |                        |
|----------------------------------|------------|------------|------------|-----------|----|---------|------------------------|
| A                                | Mock       | Mock       | 1.2        |           |    |         |                        |
| A                                | Mock       | Mock       | 0.7        |           |    |         |                        |
| A                                | Mock       | Mock       | 1.1        |           |    |         |                        |
| A                                | Mock       | Psm        | 4.1        |           |    |         |                        |
| A                                | Mock       | Psm        | 18.9       |           |    |         |                        |
| A                                | Mock       | Psm        | 16.6       |           |    |         |                        |
| A                                | Psm        | Mock       | 27.7       |           |    |         |                        |
| A                                | Psm        | Mock       | 16.7       |           |    |         |                        |
| A                                | Psm        | Mock       | 15.8       |           |    |         |                        |
| A                                | Psm        | Psm        | 65.6       |           |    |         |                        |
| A                                | Psm        | Psm        | 65.2       |           |    |         |                        |
| A                                | Psm        | Psm        | 124.3      |           |    |         |                        |
| B                                | Mock       | Mock       | 1.01       |           |    |         |                        |
| B                                | Mock       | Mock       | 1.19       |           |    |         |                        |
| B                                | Mock       | Mock       | 0.80       |           |    |         |                        |
| B                                | Mock       | Psm        | 11.24      |           |    |         |                        |
| B                                | Mock       | Psm        | 9.55       |           |    |         |                        |
| B                                | Mock       | Psm        | 16.59      |           |    |         |                        |
| B                                | Psm        | Mock       | 56.98      |           |    |         |                        |
| B                                | Psm        | Mock       | 51.22      |           |    |         |                        |
| B                                | Psm        | Mock       | 54.44      |           |    |         |                        |
| B                                | Psm        | Psm        | 220.84     |           |    |         |                        |
| B                                | Psm        | Psm        | 174.70     |           |    |         |                        |
| B                                | Psm        | Psm        | 195.29     |           |    |         |                        |
| C                                | Mock       | Mock       | 0.54       |           |    |         |                        |
| C                                | Mock       | Mock       | 1.12       |           |    |         |                        |
| C                                | Mock       | Mock       | 1.35       |           |    |         |                        |
| C                                | Mock       | Psm        | 29.01      |           |    |         |                        |
| C                                | Mock       | Psm        | 58.07      |           |    |         |                        |
| C                                | Mock       | Psm        | 52.72      |           |    |         |                        |
| C                                | Psm        | Mock       | 50.11      |           |    |         |                        |
| C                                | Psm        | Mock       | 44.16      |           |    |         |                        |
| C                                | Psm        | Mock       | 39.46      |           |    |         |                        |
| C                                | Psm        | Psm        | 292.02     |           |    |         |                        |
| C                                | Psm        | Psm        | 343.28     |           |    |         |                        |
| C                                | Psm        | Psm        | 237.15     |           |    |         |                        |
| ANOVA results                    |            |            |            | SumSq     | Df | F value | Pr(>F)                 |
| Treatment1                       |            |            |            | 94985     | 1  | 232.523 | 7.59*10 <sup>-14</sup> |
| Treatment2                       |            |            |            | 68426     | 1  | 167.506 | 2.57*10 <sup>-12</sup> |
| Experiment                       |            |            |            | 26172     | 2  | 32.035  | 1.68*10 <sup>-07</sup> |
| Treatment1:Treatment2            |            |            |            | 36996     | 1  | 90.566  | 1.28*10 <sup>-09</sup> |
| Treatment1:Experiment            |            |            |            | 15705     | 2  | 19.223  | 1.04*10 <sup>-05</sup> |
| Treatment2:Experiment            |            |            |            | 17744     | 2  | 21.719  | 4.13*10 <sup>-06</sup> |
| Treatment1:Treatment2:Experiment |            |            |            | 8210      | 2  | 10.049  | 0.0006753              |
| Residuals                        |            |            |            | 9804      | 24 |         |                        |

Supplemental Table 1. (B) Phenotype: relative *ALD1* transcript levels.

| (C)                              | Experiment | Treatment1 | Treatment2 | Phenotype |    |         |                         |
|----------------------------------|------------|------------|------------|-----------|----|---------|-------------------------|
| A                                | Mock       | Mock       | 0.91       |           |    |         |                         |
| A                                | Mock       | Mock       | 0.94       |           |    |         |                         |
| A                                | Mock       | Mock       | 1.14       |           |    |         |                         |
| A                                | Mock       | Psm        | 7.20       |           |    |         |                         |
| A                                | Mock       | Psm        | 9.80       |           |    |         |                         |
| A                                | Mock       | Psm        | 5.94       |           |    |         |                         |
| A                                | Psm        | Mock       | 7.69       |           |    |         |                         |
| A                                | Psm        | Mock       | 10.54      |           |    |         |                         |
| A                                | Psm        | Mock       | 12.34      |           |    |         |                         |
| A                                | Psm        | Psm        | 55.75      |           |    |         |                         |
| A                                | Psm        | Psm        | 23.14      |           |    |         |                         |
| A                                | Psm        | Psm        | 38.79      |           |    |         |                         |
| B                                | Mock       | Mock       | 1.17       |           |    |         |                         |
| B                                | Mock       | Mock       | 1.03       |           |    |         |                         |
| B                                | Mock       | Mock       | 0.80       |           |    |         |                         |
| B                                | Mock       | Psm        | 34.68      |           |    |         |                         |
| B                                | Mock       | Psm        | 31.41      |           |    |         |                         |
| B                                | Mock       | Psm        | 32.70      |           |    |         |                         |
| B                                | Psm        | Mock       | 196.09     |           |    |         |                         |
| B                                | Psm        | Mock       | 183.71     |           |    |         |                         |
| B                                | Psm        | Mock       | 232.66     |           |    |         |                         |
| B                                | Psm        | Psm        | 432.95     |           |    |         |                         |
| B                                | Psm        | Psm        | 524.47     |           |    |         |                         |
| B                                | Psm        | Psm        | 512.16     |           |    |         |                         |
| C                                | Mock       | Mock       | 0.71       |           |    |         |                         |
| C                                | Mock       | Mock       | 1.58       |           |    |         |                         |
| C                                | Mock       | Mock       | 0.70       |           |    |         |                         |
| C                                | Mock       | Psm        | 10.85      |           |    |         |                         |
| C                                | Mock       | Psm        | 9.45       |           |    |         |                         |
| C                                | Mock       | Psm        | 13.98      |           |    |         |                         |
| C                                | Psm        | Mock       | 33.79      |           |    |         |                         |
| C                                | Psm        | Mock       | 29.51      |           |    |         |                         |
| C                                | Psm        | Mock       | 13.73      |           |    |         |                         |
| C                                | Psm        | Psm        | 88.83      |           |    |         |                         |
| C                                | Psm        | Psm        | 60.36      |           |    |         |                         |
| C                                | Psm        | Psm        | 70.05      |           |    |         |                         |
| ANOVA results                    |            |            |            | SumSq     | Df | F value | Pr(>F)                  |
| Treatment1                       |            |            |            | 154917    | 1  | 499.78  | < 2.2*10 <sup>-16</sup> |
| Treatment2                       |            |            |            | 42262     | 1  | 136.344 | 2.20*10 <sup>-11</sup>  |
| Experiment                       |            |            |            | 207991    | 2  | 335.501 | < 2.2*10 <sup>-16</sup> |
| Treatment1:Treatment2            |            |            |            | 24514     | 1  | 79.084  | 4.62*10 <sup>-09</sup>  |
| Treatment1:Experiment            |            |            |            | 178702    | 2  | 288.257 | < 2.2*10 <sup>-16</sup> |
| Treatment2:Experiment            |            |            |            | 36871     | 2  | 59.475  | 5.02*10 <sup>-10</sup>  |
| Treatment1:Treatment2:Experiment |            |            |            | 25189     | 2  | 40.632  | 1.97*10 <sup>-08</sup>  |
| Residuals                        |            |            |            | 7439      | 24 |         |                         |

**Supplemental Table 1. (C)** Phenotype: relative SAG13 transcript levels.

| (D)                              | Experiment | Treatment1 | Treatment2 | Phenotype |    |          |                        |
|----------------------------------|------------|------------|------------|-----------|----|----------|------------------------|
| A                                | Mock       | Mock       | 1.28       |           |    |          |                        |
| A                                | Mock       | Mock       | 0.53       |           |    |          |                        |
| A                                | Mock       | Mock       | 1.19       |           |    |          |                        |
| A                                | Mock       | Psm        | 2.99       |           |    |          |                        |
| A                                | Mock       | Psm        | 6.92       |           |    |          |                        |
| A                                | Mock       | Psm        | 7.07       |           |    |          |                        |
| A                                | Psm        | Mock       | 2.40       |           |    |          |                        |
| A                                | Psm        | Mock       | 3.42       |           |    |          |                        |
| A                                | Psm        | Mock       | 3.24       |           |    |          |                        |
| A                                | Psm        | Psm        | 15.50      |           |    |          |                        |
| A                                | Psm        | Psm        | 13.44      |           |    |          |                        |
| A                                | Psm        | Psm        | 18.54      |           |    |          |                        |
| B                                | Mock       | Mock       | 1.33       |           |    |          |                        |
| B                                | Mock       | Mock       | 0.77       |           |    |          |                        |
| B                                | Mock       | Mock       | 0.91       |           |    |          |                        |
| B                                | Mock       | Psm        | 11.09      |           |    |          |                        |
| B                                | Mock       | Psm        | 12.01      |           |    |          |                        |
| B                                | Mock       | Psm        | 9.45       |           |    |          |                        |
| B                                | Psm        | Mock       | 15.07      |           |    |          |                        |
| B                                | Psm        | Mock       | 13.83      |           |    |          |                        |
| B                                | Psm        | Mock       | 9.79       |           |    |          |                        |
| B                                | Psm        | Psm        | 72.00      |           |    |          |                        |
| B                                | Psm        | Psm        | 64.85      |           |    |          |                        |
| B                                | Psm        | Psm        | 57.37      |           |    |          |                        |
| C                                | Mock       | Mock       | 0.79       |           |    |          |                        |
| C                                | Mock       | Mock       | 1.31       |           |    |          |                        |
| C                                | Mock       | Mock       | 0.90       |           |    |          |                        |
| C                                | Mock       | Psm        | 9.33       |           |    |          |                        |
| C                                | Mock       | Psm        | 11.88      |           |    |          |                        |
| C                                | Mock       | Psm        | 18.04      |           |    |          |                        |
| C                                | Psm        | Mock       | 15.35      |           |    |          |                        |
| C                                | Psm        | Mock       | 11.82      |           |    |          |                        |
| C                                | Psm        | Mock       | 8.37       |           |    |          |                        |
| C                                | Psm        | Psm        | 52.59      |           |    |          |                        |
| C                                | Psm        | Psm        | 75.30      |           |    |          |                        |
| C                                | Psm        | Psm        | 35.84      |           |    |          |                        |
| ANOVA results                    |            |            |            | SumSq     | Df | F value  | Pr(>F)                 |
| Treatment1                       |            |            |            | 4245.2    | 1  | 101.9153 | 4.08*10 <sup>-10</sup> |
| Treatment2                       |            |            |            | 4487      | 1  | 107.7206 | 2.37*10 <sup>-10</sup> |
| Experiment                       |            |            |            | 1799.9    | 2  | 21.6053  | 4.30*10 <sup>-06</sup> |
| Treatment1:Treatment2            |            |            |            | 1631.8    | 1  | 39.1741  | 1.81*10 <sup>-06</sup> |
| Treatment1:Experiment            |            |            |            | 1166.4    | 2  | 14.0011  | 9.34*10 <sup>-05</sup> |
| Treatment2:Experiment            |            |            |            | 849.4     | 2  | 10.1964  | 0.0006234              |
| Treatment1:Treatment2:Experiment |            |            |            | 445.2     | 2  | 5.3443   | 0.0120307              |
| Residuals                        |            |            |            | 999.7     | 24 |          |                        |

**Supplemental Table 1. (D)** Phenotype: relative *GRXS13* transcript levels.

| (E)                              | Experiment | Treatment1 | Treatment2 | Phenotype |    |          |                        |
|----------------------------------|------------|------------|------------|-----------|----|----------|------------------------|
| A                                | Mock       | Mock       | 1.78       |           |    |          |                        |
| A                                | Mock       | Mock       | 0.46       |           |    |          |                        |
| A                                | Mock       | Mock       | 0.76       |           |    |          |                        |
| A                                | Mock       | Psm        | 6.77       |           |    |          |                        |
| A                                | Mock       | Psm        | 18.15      |           |    |          |                        |
| A                                | Mock       | Psm        | 13.46      |           |    |          |                        |
| A                                | Psm        | Mock       | 10.96      |           |    |          |                        |
| A                                | Psm        | Mock       | 25.25      |           |    |          |                        |
| A                                | Psm        | Mock       | 7.12       |           |    |          |                        |
| A                                | Psm        | Psm        | 94.79      |           |    |          |                        |
| A                                | Psm        | Psm        | 70.51      |           |    |          |                        |
| A                                | Psm        | Psm        | 102.51     |           |    |          |                        |
| B                                | Mock       | Mock       | 1.30       |           |    |          |                        |
| B                                | Mock       | Mock       | 0.87       |           |    |          |                        |
| B                                | Mock       | Mock       | 0.83       |           |    |          |                        |
| B                                | Mock       | Psm        | 8.55       |           |    |          |                        |
| B                                | Mock       | Psm        | 6.90       |           |    |          |                        |
| B                                | Mock       | Psm        | 7.25       |           |    |          |                        |
| B                                | Psm        | Mock       | 30.99      |           |    |          |                        |
| B                                | Psm        | Mock       | 31.74      |           |    |          |                        |
| B                                | Psm        | Mock       | 30.83      |           |    |          |                        |
| B                                | Psm        | Psm        | 174.19     |           |    |          |                        |
| B                                | Psm        | Psm        | 138.25     |           |    |          |                        |
| B                                | Psm        | Psm        | 135.69     |           |    |          |                        |
| C                                | Mock       | Mock       | 1.38       |           |    |          |                        |
| C                                | Mock       | Mock       | 0.69       |           |    |          |                        |
| C                                | Mock       | Mock       | 0.92       |           |    |          |                        |
| C                                | Mock       | Psm        | 6.00       |           |    |          |                        |
| C                                | Mock       | Psm        | 5.77       |           |    |          |                        |
| C                                | Mock       | Psm        | 10.62      |           |    |          |                        |
| C                                | Psm        | Mock       | 41.54      |           |    |          |                        |
| C                                | Psm        | Mock       | 28.15      |           |    |          |                        |
| C                                | Psm        | Mock       | 22.15      |           |    |          |                        |
| C                                | Psm        | Psm        | 168.92     |           |    |          |                        |
| C                                | Psm        | Psm        | 139.62     |           |    |          |                        |
| C                                | Psm        | Psm        | 89.31      |           |    |          |                        |
| ANOVA results                    |            |            |            | SumSq     | Df | F value  | Pr(>F)                 |
| Treatment1                       |            |            |            | 43407     | 1  | 200.7128 | 3.74*10 <sup>-13</sup> |
| Treatment2                       |            |            |            | 25575     | 1  | 118.2605 | 9.33*10 <sup>-11</sup> |
| Experiment                       |            |            |            | 2092      | 2  | 4.8378   | 0.01717                |
| Treatment1:Treatment2            |            |            |            | 18251     | 1  | 84.3928  | 2.51*10 <sup>-09</sup> |
| Treatment1:Experiment            |            |            |            | 2810      | 2  | 6.496    | 0.005562               |
| Treatment2:Experiment            |            |            |            | 549       | 2  | 1.2699   | 0.299061               |
| Treatment1:Treatment2:Experiment |            |            |            | 919       | 2  | 2.1249   | 0.141373               |
| Residuals                        |            |            |            | 5190      | 24 |          |                        |

Supplemental Table 1. (E) Phenotype: relative *ARD3* transcript levels.

| (F)                              | Experiment | Treatment1 | Treatment2 | Phenotype |    |         |                         |
|----------------------------------|------------|------------|------------|-----------|----|---------|-------------------------|
| A                                | Mock       | Mock       | 0.69       |           |    |         |                         |
| A                                | Mock       | Mock       | 0.59       |           |    |         |                         |
| A                                | Mock       | Mock       | 1.73       |           |    |         |                         |
| A                                | Mock       | Psm        | 2.52       |           |    |         |                         |
| A                                | Mock       | Psm        | 10.92      |           |    |         |                         |
| A                                | Mock       | Psm        | 5.18       |           |    |         |                         |
| A                                | Psm        | Mock       | 25.09      |           |    |         |                         |
| A                                | Psm        | Mock       | 32.40      |           |    |         |                         |
| A                                | Psm        | Mock       | 18.52      |           |    |         |                         |
| A                                | Psm        | Psm        | 58.11      |           |    |         |                         |
| A                                | Psm        | Psm        | 42.08      |           |    |         |                         |
| A                                | Psm        | Psm        | 73.62      |           |    |         |                         |
| B                                | Mock       | Mock       | 1.09       |           |    |         |                         |
| B                                | Mock       | Mock       | 0.99       |           |    |         |                         |
| B                                | Mock       | Mock       | 0.91       |           |    |         |                         |
| B                                | Mock       | Psm        | 6.09       |           |    |         |                         |
| B                                | Mock       | Psm        | 3.46       |           |    |         |                         |
| B                                | Mock       | Psm        | 4.01       |           |    |         |                         |
| B                                | Psm        | Mock       | 222.72     |           |    |         |                         |
| B                                | Psm        | Mock       | 193.26     |           |    |         |                         |
| B                                | Psm        | Mock       | 190.60     |           |    |         |                         |
| B                                | Psm        | Psm        | 259.30     |           |    |         |                         |
| B                                | Psm        | Psm        | 278.54     |           |    |         |                         |
| B                                | Psm        | Psm        | 235.25     |           |    |         |                         |
| C                                | Mock       | Mock       | 1.23       |           |    |         |                         |
| C                                | Mock       | Mock       | 0.98       |           |    |         |                         |
| C                                | Mock       | Mock       | 0.79       |           |    |         |                         |
| C                                | Mock       | Psm        | 7.95       |           |    |         |                         |
| C                                | Mock       | Psm        | 4.29       |           |    |         |                         |
| C                                | Mock       | Psm        | 7.28       |           |    |         |                         |
| C                                | Psm        | Mock       | 106.87     |           |    |         |                         |
| C                                | Psm        | Mock       | 59.76      |           |    |         |                         |
| C                                | Psm        | Mock       | 90.75      |           |    |         |                         |
| C                                | Psm        | Psm        | 192.60     |           |    |         |                         |
| C                                | Psm        | Psm        | 261.71     |           |    |         |                         |
| C                                | Psm        | Psm        | 243.62     |           |    |         |                         |
| ANOVA results                    |            |            |            | SumSq     | Df | F value | Pr(>F)                  |
| Treatment1                       |            |            |            | 176974    | 1  | 715.67  | < 2.2*10 <sup>-16</sup> |
| Treatment2                       |            |            |            | 15523     | 1  | 62.776  | 3.74*10 <sup>-08</sup>  |
| Experiment                       |            |            |            | 53865     | 2  | 108.912 | 9.13*10 <sup>-13</sup>  |
| Treatment1:Treatment2            |            |            |            | 12179     | 1  | 49.252  | 2.95*10 <sup>-07</sup>  |
| Treatment1:Experiment            |            |            |            | 54714     | 2  | 110.63  | 7.71*10 <sup>-13</sup>  |
| Treatment2:Experiment            |            |            |            | 5571      | 2  | 11.264  | 0.0003548               |
| Treatment1:Treatment2:Experiment |            |            |            | 5393      | 2  | 10.905  | 0.0004275               |
| Residuals                        |            |            |            | 5935      | 24 |         |                         |

Supplemental Table 1. (F) Phenotype: relative *PR1* transcript levels.

| (G)                              | Experiment | Treatment1 | Treatment2 | Phenotype |    |         |                        |
|----------------------------------|------------|------------|------------|-----------|----|---------|------------------------|
| A                                | Mock       | Mock       | 0.02       |           |    |         |                        |
| A                                | Mock       | Mock       | 0.05       |           |    |         |                        |
| A                                | Mock       | Mock       | 0.03       |           |    |         |                        |
| A                                | Mock       | Psm        | 0.67       |           |    |         |                        |
| A                                | Mock       | Psm        | 0.59       |           |    |         |                        |
| A                                | Mock       | Psm        | 0.70       |           |    |         |                        |
| A                                | Psm        | Mock       | 0.31       |           |    |         |                        |
| A                                | Psm        | Mock       | 0.60       |           |    |         |                        |
| A                                | Psm        | Mock       | 0.21       |           |    |         |                        |
| A                                | Psm        | Psm        | 3.36       |           |    |         |                        |
| A                                | Psm        | Psm        | 3.51       |           |    |         |                        |
| A                                | Psm        | Psm        | 4.31       |           |    |         |                        |
| B                                | Mock       | Mock       | 0.23       |           |    |         |                        |
| B                                | Mock       | Mock       | 0.09       |           |    |         |                        |
| B                                | Mock       | Mock       | 0.13       |           |    |         |                        |
| B                                | Mock       | Psm        | 1.32       |           |    |         |                        |
| B                                | Mock       | Psm        | 1.82       |           |    |         |                        |
| B                                | Mock       | Psm        | 0.92       |           |    |         |                        |
| B                                | Psm        | Mock       | 0.72       |           |    |         |                        |
| B                                | Psm        | Mock       | 0.44       |           |    |         |                        |
| B                                | Psm        | Mock       | 0.78       |           |    |         |                        |
| B                                | Psm        | Psm        | 9.48       |           |    |         |                        |
| B                                | Psm        | Psm        | 18.78      |           |    |         |                        |
| B                                | Psm        | Psm        | 17.11      |           |    |         |                        |
| C                                | Mock       | Mock       | 0.12       |           |    |         |                        |
| C                                | Mock       | Mock       | 0.06       |           |    |         |                        |
| C                                | Mock       | Mock       | 0.18       |           |    |         |                        |
| C                                | Mock       | Psm        | 0.80       |           |    |         |                        |
| C                                | Mock       | Psm        | 1.54       |           |    |         |                        |
| C                                | Mock       | Psm        | 0.75       |           |    |         |                        |
| C                                | Psm        | Mock       | 0.38       |           |    |         |                        |
| C                                | Psm        | Mock       | 0.27       |           |    |         |                        |
| C                                | Psm        | Mock       | 0.30       |           |    |         |                        |
| C                                | Psm        | Psm        | 5.47       |           |    |         |                        |
| C                                | Psm        | Psm        | 7.20       |           |    |         |                        |
| C                                | Psm        | Psm        | 7.56       |           |    |         |                        |
| ANOVA results                    |            |            |            | SumSq     | Df | F value | Pr(>F)                 |
| Treatment1                       |            |            |            | 139.122   | 1  | 62.808  | 3.73*10 <sup>-08</sup> |
| Treatment2                       |            |            |            | 182.115   | 1  | 82.218  | 3.21*10 <sup>-09</sup> |
| Experiment                       |            |            |            | 62.445    | 2  | 14.096  | 8.94*10 <sup>-05</sup> |
| Treatment1:Treatment2            |            |            |            | 115.813   | 1  | 52.285  | 1.80*10 <sup>-07</sup> |
| Treatment1:Experiment            |            |            |            | 48.466    | 2  | 10.94   | 0.0004198              |
| Treatment2:Experiment            |            |            |            | 54.492    | 2  | 12.301  | 0.0002103              |
| Treatment1:Treatment2:Experiment |            |            |            | 44.751    | 2  | 10.102  | 0.0006563              |
| Residuals                        |            |            |            | 53.161    | 24 |         |                        |

**Supplemental Table 1. (G) Phenotype: Camalexin levels ( $\mu\text{g g}^{-1}$  FW).**

| (H)                              | Experiment | Treatment1 | Treatment2 | Phenotype |                         |
|----------------------------------|------------|------------|------------|-----------|-------------------------|
| A                                | Mock       | Mock       | 1.15       |           |                         |
| A                                | Mock       | Mock       | 1.19       |           |                         |
| A                                | Mock       | Mock       | 0.85       |           |                         |
| A                                | Mock       | Psm        | 2.03       |           |                         |
| A                                | Mock       | Psm        | 2.95       |           |                         |
| A                                | Mock       | Psm        | 3.03       |           |                         |
| A                                | Psm        | Mock       | 3.27       |           |                         |
| A                                | Psm        | Mock       | 2.26       |           |                         |
| A                                | Psm        | Mock       | 3.29       |           |                         |
| A                                | Psm        | Psm        | 15.92      |           |                         |
| A                                | Psm        | Psm        | 15.13      |           |                         |
| A                                | Psm        | Psm        | 14.45      |           |                         |
| B                                | Mock       | Mock       | 0.67       |           |                         |
| B                                | Mock       | Mock       | 0.84       |           |                         |
| B                                | Mock       | Mock       | 0.49       |           |                         |
| B                                | Mock       | Psm        | 6.22       |           |                         |
| B                                | Mock       | Psm        | 5.58       |           |                         |
| B                                | Mock       | Psm        | 6.55       |           |                         |
| B                                | Psm        | Mock       | 3.90       |           |                         |
| B                                | Psm        | Mock       | 3.49       |           |                         |
| B                                | Psm        | Mock       | 3.11       |           |                         |
| B                                | Psm        | Psm        | 11.04      |           |                         |
| B                                | Psm        | Psm        | 11.60      |           |                         |
| B                                | Psm        | Psm        | 13.12      |           |                         |
| C                                | Mock       | Mock       | 0.67       |           |                         |
| C                                | Mock       | Mock       | 0.84       |           |                         |
| C                                | Mock       | Mock       | 0.49       |           |                         |
| C                                | Mock       | Psm        | 6.22       |           |                         |
| C                                | Mock       | Psm        | 5.58       |           |                         |
| C                                | Mock       | Psm        | 6.55       |           |                         |
| C                                | Psm        | Mock       | 3.89       |           |                         |
| C                                | Psm        | Mock       | 3.52       |           |                         |
| C                                | Psm        | Mock       | 3.10       |           |                         |
| C                                | Psm        | Psm        | 11.04      |           |                         |
| C                                | Psm        | Psm        | 11.60      |           |                         |
| C                                | Psm        | Psm        | 13.12      |           |                         |
| ANOVA results                    |            | SumSq      | Df         | F value   | Pr(>F)                  |
| Treatment1                       |            | 250.43     | 1          | 681.7015  | $< 2.2 \times 10^{-16}$ |
| Treatment2                       |            | 432.02     | 1          | 1175.9988 | $< 2.2 \times 10^{-16}$ |
| Experiment                       |            | 0.07       | 2          | 0.0907    | 0.9136                  |
| Treatment1:Treatment2            |            | 68.53      | 1          | 186.5489  | $8.20 \times 10^{-13}$  |
| Treatment1:Experiment            |            | 16.45      | 2          | 22.3828   | $3.27 \times 10^{-06}$  |
| Treatment2:Experiment            |            | 0          | 2          | 0.0008    | 0.9992                  |
| Treatment1:Treatment2:Experiment |            | 29.27      | 2          | 39.8436   | $2.37 \times 10^{-08}$  |
| Residuals                        |            | 8.82       | 24         |           |                         |

**Supplemental Table 1. (H) Phenotype: Total salicylic acid levels ( $\mu\text{g g}^{-1}$  FW).**

| (A) | Experiment | Treatment1 | Treatment2 | Phenotype |
|-----|------------|------------|------------|-----------|
| A   | A          | H2O        | Mock       | 1.05      |
| A   | A          | H2O        | Mock       | 0.95      |
| A   | A          | H2O        | Mock       | 1.00      |
| A   | A          | H2O        | Psm        | 124.84    |
| A   | A          | H2O        | Psm        | 57.83     |
| A   | A          | H2O        | Psm        | 112.75    |
| A   | A          | Pip        | Mock       | 12.76     |
| A   | A          | Pip        | Mock       | 2.95      |
| A   | A          | Pip        | Mock       | 19.23     |
| A   | A          | Pip        | Psm        | 494.69    |
| A   | A          | Pip        | Psm        | 438.20    |
| A   | A          | Pip        | Psm        | 455.22    |
| B   | B          | H2O        | Mock       | 0.71      |
| B   | B          | H2O        | Mock       | 1.26      |
| B   | B          | H2O        | Mock       | 1.03      |
| B   | B          | H2O        | Psm        | 38.71     |
| B   | B          | H2O        | Psm        | 47.94     |
| B   | B          | H2O        | Psm        | 52.67     |
| B   | B          | Pip        | Mock       | 9.73      |
| B   | B          | Pip        | Mock       | 7.24      |
| B   | B          | Pip        | Mock       | 11.45     |
| B   | B          | Pip        | Psm        | 363.50    |
| B   | B          | Pip        | Psm        | 234.22    |
| B   | B          | Pip        | Psm        | 211.57    |
| C   | C          | H2O        | Mock       | 1.07      |
| C   | C          | H2O        | Mock       | 1.08      |
| C   | C          | H2O        | Mock       | 0.86      |
| C   | C          | H2O        | Psm        | 43.16     |
| C   | C          | H2O        | Psm        | 54.51     |
| C   | C          | H2O        | Psm        | 62.09     |
| C   | C          | Pip        | Mock       | 15.13     |
| C   | C          | Pip        | Mock       | 11.08     |
| C   | C          | Pip        | Mock       | 21.40     |
| C   | C          | Pip        | Psm        | 596.04    |
| C   | C          | Pip        | Psm        | 753.22    |
| C   | C          | Pip        | Psm        | 458.27    |

  

| ANOVA results                    | SumSq  | Df | F value  | Pr(>F)                 |
|----------------------------------|--------|----|----------|------------------------|
| Treatment1                       | 342691 | 1  | 133.2838 | 2.77*10 <sup>-11</sup> |
| Treatment2                       | 557374 | 1  | 216.7811 | 1.63*10 <sup>-13</sup> |
| Experiment                       | 47633  | 2  | 9.2631   | 0.001044               |
| Treatment1:Treatment2            | 304055 | 1  | 118.2569 | 9.33*10 <sup>-11</sup> |
| Treatment1:Experiment            | 41682  | 2  | 8.1057   | 0.002043               |
| Treatment2:Experiment            | 44528  | 2  | 8.6592   | 0.001475               |
| Treatment1:Treatment2:Experiment | 38511  | 2  | 7.4891   | 0.002969               |
| Residuals                        | 61707  | 24 |          |                        |

**Supplemental Table 2.** Linear model-based analysis of the pipecolic acid-induced priming response in Col-0 plants to estimate treatment and experimental effect terms.

**(A) Phenotype:** relative *FMO1* transcript levels.

An analysis of variance (ANOVA) was performed with the depicted data (“object1”) from three independent experiments (A, B, and C), each consisting of three biological replicate samples per treatment type, using the R statistical package and the command:

“Anova(lm(Phenotype~Treatment1+Treatment2+Experiment+Treatment1\*Treatment2+Treatment1\*Experiment+Treatment2\*Experiment+Treatment1\*Treatment2\*Experiment, data=object1),type=2)”.

Pip-induced priming was assessed as described in Fig. 8.

Treatment1: effect term for pre-treatment of plants (H<sub>2</sub>O or Pip); Treatment2: effect term for the subsequent treatment of leaves (Mock or *Psm*).

Treatment1\*Treatment2: effect term for the interaction of treatments (“Priming”).

Experiment: Term reflecting variation between experiments; Experiment\*Treatmentx: Term reflecting experimental impact on effect of treatment x; Experiment\*Treatment1\*Treatment2: Term reflecting experimental influence on treatment interaction.

SumSq: type II-sum of squares. Df: degrees of freedom. Pr(>F): P-value associated with a corresponding F value.



| (B)                              | Experiment | Treatment1 | Treatment2 | Phenotype |    |         |                         |
|----------------------------------|------------|------------|------------|-----------|----|---------|-------------------------|
| A                                | A          | H2O        | Mock       | 0.45      |    |         |                         |
| A                                | A          | H2O        | Mock       | 1.54      |    |         |                         |
| A                                | A          | H2O        | Mock       | 1.01      |    |         |                         |
| A                                | A          | H2O        | Psm        | 21.42     |    |         |                         |
| A                                | A          | H2O        | Psm        | 16.66     |    |         |                         |
| A                                | A          | H2O        | Psm        | 23.67     |    |         |                         |
| A                                | A          | Pip        | Mock       | 11.00     |    |         |                         |
| A                                | A          | Pip        | Mock       | 13.53     |    |         |                         |
| A                                | A          | Pip        | Mock       | 20.39     |    |         |                         |
| A                                | A          | Pip        | Psm        | 111.24    |    |         |                         |
| A                                | A          | Pip        | Psm        | 92.73     |    |         |                         |
| A                                | A          | Pip        | Psm        | 125.75    |    |         |                         |
| B                                | B          | H2O        | Mock       | 1.16      |    |         |                         |
| B                                | B          | H2O        | Mock       | 0.92      |    |         |                         |
| B                                | B          | H2O        | Mock       | 0.92      |    |         |                         |
| B                                | B          | H2O        | Psm        | 15.93     |    |         |                         |
| B                                | B          | H2O        | Psm        | 14.89     |    |         |                         |
| B                                | B          | H2O        | Psm        | 16.44     |    |         |                         |
| B                                | B          | Pip        | Mock       | 3.58      |    |         |                         |
| B                                | B          | Pip        | Mock       | 2.13      |    |         |                         |
| B                                | B          | Pip        | Mock       | 5.75      |    |         |                         |
| B                                | B          | Pip        | Psm        | 50.52     |    |         |                         |
| B                                | B          | Pip        | Psm        | 41.10     |    |         |                         |
| B                                | B          | Pip        | Psm        | 42.96     |    |         |                         |
| C                                | C          | H2O        | Mock       | 1.17      |    |         |                         |
| C                                | C          | H2O        | Mock       | 1.03      |    |         |                         |
| C                                | C          | H2O        | Mock       | 0.80      |    |         |                         |
| C                                | C          | H2O        | Psm        | 7.78      |    |         |                         |
| C                                | C          | H2O        | Psm        | 4.98      |    |         |                         |
| C                                | C          | H2O        | Psm        | 12.07     |    |         |                         |
| C                                | C          | Pip        | Mock       | 10.61     |    |         |                         |
| C                                | C          | Pip        | Mock       | 19.24     |    |         |                         |
| C                                | C          | Pip        | Mock       | 17.40     |    |         |                         |
| C                                | C          | Pip        | Psm        | 107.43    |    |         |                         |
| C                                | C          | Pip        | Psm        | 114.60    |    |         |                         |
| C                                | C          | Pip        | Psm        | 97.17     |    |         |                         |
| ANOVA results                    |            |            |            | SumSq     | Df | F value | Pr(>F)                  |
| Treatment1                       |            |            |            | 15388     | 1  | 410.643 | $< 2.2 \times 10^{-16}$ |
| Treatment2                       |            |            |            | 17987.7   | 1  | 480.019 | $< 2.2 \times 10^{-16}$ |
| Experiment                       |            |            |            | 2786.8    | 2  | 37.184  | $4.45 \times 10^{-08}$  |
| Treatment1:Treatment2            |            |            |            | 8557.2    | 1  | 228.356 | $9.24 \times 10^{-14}$  |
| Treatment1:Experiment            |            |            |            | 2934.4    | 2  | 39.154  | $2.78 \times 10^{-08}$  |
| Treatment2:Experiment            |            |            |            | 1374.7    | 2  | 18.343  | $1.46 \times 10^{-05}$  |
| Treatment1:Treatment2:Experiment |            |            |            | 1432.6    | 2  | 19.115  | $1.08 \times 10^{-05}$  |
| Residuals                        |            |            |            | 899.4     | 24 |         |                         |

Supplemental Table 2. (B) Phenotype: relative *ALD1* transcript levels.

| (C)                              | Experiment | Treatment1 | Treatment2 | Phenotype |    |         |                        |
|----------------------------------|------------|------------|------------|-----------|----|---------|------------------------|
| A                                |            | H2O        | Mock       | 0.61      |    |         |                        |
| A                                |            | H2O        | Mock       | 0.86      |    |         |                        |
| A                                |            | H2O        | Mock       | 1.53      |    |         |                        |
| A                                |            | H2O        | Psm        | 6.52      |    |         |                        |
| A                                |            | H2O        | Psm        | 8.88      |    |         |                        |
| A                                |            | H2O        | Psm        | 7.21      |    |         |                        |
| A                                |            | Pip        | Mock       | 13.97     |    |         |                        |
| A                                |            | Pip        | Mock       | 9.15      |    |         |                        |
| A                                |            | Pip        | Mock       | 14.91     |    |         |                        |
| A                                |            | Pip        | Psm        | 51.64     |    |         |                        |
| A                                |            | Pip        | Psm        | 27.18     |    |         |                        |
| A                                |            | Pip        | Psm        | 35.32     |    |         |                        |
| B                                |            | H2O        | Mock       | 0.74      |    |         |                        |
| B                                |            | H2O        | Mock       | 0.85      |    |         |                        |
| B                                |            | H2O        | Mock       | 1.41      |    |         |                        |
| B                                |            | H2O        | Psm        | 3.16      |    |         |                        |
| B                                |            | H2O        | Psm        | 3.74      |    |         |                        |
| B                                |            | H2O        | Psm        | 3.19      |    |         |                        |
| B                                |            | Pip        | Mock       | 3.79      |    |         |                        |
| B                                |            | Pip        | Mock       | 1.93      |    |         |                        |
| B                                |            | Pip        | Mock       | 4.41      |    |         |                        |
| B                                |            | Pip        | Psm        | 21.52     |    |         |                        |
| B                                |            | Pip        | Psm        | 12.75     |    |         |                        |
| B                                |            | Pip        | Psm        | 12.27     |    |         |                        |
| C                                |            | H2O        | Mock       | 0.62      |    |         |                        |
| C                                |            | H2O        | Mock       | 1.40      |    |         |                        |
| C                                |            | H2O        | Mock       | 0.98      |    |         |                        |
| C                                |            | H2O        | Psm        | 12.03     |    |         |                        |
| C                                |            | H2O        | Psm        | 6.48      |    |         |                        |
| C                                |            | H2O        | Psm        | 9.83      |    |         |                        |
| C                                |            | Pip        | Mock       | 5.03      |    |         |                        |
| C                                |            | Pip        | Mock       | 2.64      |    |         |                        |
| C                                |            | Pip        | Mock       | 2.85      |    |         |                        |
| C                                |            | Pip        | Psm        | 29.78     |    |         |                        |
| C                                |            | Pip        | Psm        | 36.85     |    |         |                        |
| C                                |            | Pip        | Psm        | 64.38     |    |         |                        |
| ANOVA results                    |            |            |            | SumSq     | Df | F value | Pr(>F)                 |
| Treatment1                       |            |            |            | 2182.91   | 1  | 48.5717 | 3.31*10 <sup>-07</sup> |
| Treatment2                       |            |            |            | 2257.04   | 1  | 50.2212 | 2.52*10 <sup>-07</sup> |
| Experiment                       |            |            |            | 620.11    | 2  | 6.899   | 0.0042944              |
| Treatment1:Treatment2            |            |            |            | 909.73    | 1  | 20.2422 | 0.0001484              |
| Treatment1:Experiment            |            |            |            | 321.96    | 2  | 3.5819  | 0.0435227              |
| Treatment2:Experiment            |            |            |            | 436.37    | 2  | 4.8548  | 0.0169623              |
| Treatment1:Treatment2:Experiment |            |            |            | 182.39    | 2  | 2.0292  | 0.1533831              |
| Residuals                        |            |            |            | 1078.61   | 24 |         |                        |

**Supplemental Table 2. (C) Phenotype: relative *PR1* transcript levels.**

| (D)                              | Experiment | Treatment1 | Treatment2 | Phenotype |    |         |                        |
|----------------------------------|------------|------------|------------|-----------|----|---------|------------------------|
| A                                | A          | H2O        | Mock       | 0.07      |    |         |                        |
| A                                | A          | H2O        | Mock       | 0.23      |    |         |                        |
| A                                | A          | H2O        | Mock       | 0.14      |    |         |                        |
| A                                | A          | H2O        | Psm        | 0.78      |    |         |                        |
| A                                | A          | H2O        | Psm        | 0.63      |    |         |                        |
| A                                | A          | H2O        | Psm        | 1.09      |    |         |                        |
| A                                | A          | Pip        | Mock       | 0.24      |    |         |                        |
| A                                | A          | Pip        | Mock       | 0.27      |    |         |                        |
| A                                | A          | Pip        | Mock       | 0.13      |    |         |                        |
| A                                | A          | Pip        | Psm        | 4.44      |    |         |                        |
| A                                | A          | Pip        | Psm        | 4.16      |    |         |                        |
| A                                | A          | Pip        | Psm        | 3.88      |    |         |                        |
| B                                | B          | H2O        | Mock       | 0.01      |    |         |                        |
| B                                | B          | H2O        | Mock       | 0.12      |    |         |                        |
| B                                | B          | H2O        | Mock       | 0.02      |    |         |                        |
| B                                | B          | H2O        | Psm        | 0.19      |    |         |                        |
| B                                | B          | H2O        | Psm        | 0.39      |    |         |                        |
| B                                | B          | H2O        | Psm        | 0.45      |    |         |                        |
| B                                | B          | Pip        | Mock       | 0.23      |    |         |                        |
| B                                | B          | Pip        | Mock       | 0.52      |    |         |                        |
| B                                | B          | Pip        | Mock       | 0.10      |    |         |                        |
| B                                | B          | Pip        | Psm        | 3.05      |    |         |                        |
| B                                | B          | Pip        | Psm        | 5.31      |    |         |                        |
| B                                | B          | Pip        | Psm        | 4.93      |    |         |                        |
| C                                | C          | H2O        | Mock       | 0.30      |    |         |                        |
| C                                | C          | H2O        | Mock       | 0.23      |    |         |                        |
| C                                | C          | H2O        | Mock       | 0.13      |    |         |                        |
| C                                | C          | H2O        | Psm        | 1.05      |    |         |                        |
| C                                | C          | H2O        | Psm        | 0.58      |    |         |                        |
| C                                | C          | H2O        | Psm        | 0.85      |    |         |                        |
| C                                | C          | Pip        | Mock       | 0.49      |    |         |                        |
| C                                | C          | Pip        | Mock       | 0.73      |    |         |                        |
| C                                | C          | Pip        | Mock       | 0.66      |    |         |                        |
| C                                | C          | Pip        | Psm        | 10.96     |    |         |                        |
| C                                | C          | Pip        | Psm        | 8.78      |    |         |                        |
| C                                | C          | Pip        | Psm        | 14.80     |    |         |                        |
| ANOVA results                    |            |            |            | SumSq     | Df | F value | Pr(>F)                 |
| Treatment1                       |            |            |            | 88.172    | 1  | 95.713  | 7.53*10 <sup>-10</sup> |
| Treatment2                       |            |            |            | 105.473   | 1  | 114.493 | 1.29*10 <sup>-10</sup> |
| Experiment                       |            |            |            | 31.89     | 2  | 17.308  | 2.22*10 <sup>-05</sup> |
| Treatment1:Treatment2            |            |            |            | 75.864    | 1  | 82.352  | 3.16*10 <sup>-09</sup> |
| Treatment1:Experiment            |            |            |            | 26.314    | 2  | 14.282  | 8.21*10 <sup>-05</sup> |
| Treatment2:Experiment            |            |            |            | 24.026    | 2  | 13.041  | 0.0001467              |
| Treatment1:Treatment2:Experiment |            |            |            | 22.913    | 2  | 12.436  | 0.0001967              |
| Residuals                        |            |            |            | 22.109    | 24 |         |                        |

**Supplemental Table 2. (D) Phenotype: Camalexin levels ( $\mu\text{g g}^{-1}$  FW).**

| Experiment | Treatment1 | Treatment2 | Phenotype |
|------------|------------|------------|-----------|
| A          | H2O        | Mock       | 1.5       |
| A          | H2O        | Mock       | 0.2       |
| A          | H2O        | Mock       | 1.3       |
| A          | H2O        | SA         | 585.1     |
| A          | H2O        | SA         | 336.0     |
| A          | H2O        | SA         | 625.5     |
| A          | Pip        | Mock       | 111.5     |
| A          | Pip        | Mock       | 114.4     |
| A          | Pip        | Mock       | 103.7     |
| A          | Pip        | SA         | 1270.1    |
| A          | Pip        | SA         | 1990.2    |
| A          | Pip        | SA         | 1291.4    |
| B          | H2O        | Mock       | 0.9       |
| B          | H2O        | Mock       | 1.4       |
| B          | H2O        | Mock       | 0.7       |
| B          | H2O        | SA         | 2260.9    |
| B          | H2O        | SA         | 2165.2    |
| B          | H2O        | SA         | 2253.5    |
| B          | Pip        | Mock       | 1443.6    |
| B          | Pip        | Mock       | 803.6     |
| B          | Pip        | Mock       | 1377.9    |
| B          | Pip        | SA         | 8419.1    |
| B          | Pip        | SA         | 7856.1    |
| B          | Pip        | SA         | 15973.9   |
| C          | H2O        | Mock       | 0.7       |
| C          | H2O        | Mock       | 0.6       |
| C          | H2O        | Mock       | 1.7       |
| C          | H2O        | SA         | 227.9     |
| C          | H2O        | SA         | 497.1     |
| C          | H2O        | SA         | 669.6     |
| C          | Pip        | Mock       | 51.5      |
| C          | Pip        | Mock       | 180.6     |
| C          | Pip        | Mock       | 47.0      |
| C          | Pip        | SA         | 3071.4    |
| C          | Pip        | SA         | 1121.0    |
| C          | Pip        | SA         | 1765.3    |

| ANOVA results                    | SumSq    | Df | F value | Pr(>F)                 |
|----------------------------------|----------|----|---------|------------------------|
| Treatment1                       | 38776567 | 1  | 21.2372 | 0.0001124              |
| Treatment2                       | 64364518 | 1  | 35.2512 | 3.98*10 <sup>-06</sup> |
| Experiment                       | 70169530 | 2  | 19.2153 | 1.04*10 <sup>-05</sup> |
| Treatment1:Treatment2            | 23220994 | 1  | 12.7177 | 0.0015636              |
| Treatment1:Experiment            | 35112399 | 2  | 9.6152  | 0.0008572              |
| Treatment2:Experiment            | 46415765 | 2  | 12.7105 | 0.000172               |
| Treatment1:Treatment2:Experiment | 19049097 | 2  | 5.2164  | 0.0131481              |
| Residuals                        | 43821113 | 24 |         |                        |

**Supplemental Table 3.** Linear model-based analysis of the amplification of salicylic acid-induced *PR1* expression by pipercolic acid in Col-0 plants to estimate treatment and experimental effect terms. Phenotype: relative *PR1* transcript levels.

An analysis of variance (ANOVA) was performed with the depicted data ("object1") from three independent experiments (A, B, and C), each consisting of three biological replicate samples per treatment type, using the R statistical package and the command:

"Anova(lm(Phenotype~Treatment1+Treatment2+Experiment+Treatment1\*Treatment2+Treatment1\*Experiment+Treatment2\*Experiment+Treatment1\*Treatment2\*Experiment, data=object1),type=2)".

Pip- and SA-treatments were performed as described in Fig. 9.

Treatment1: effect term for pre-treatment of plants (H<sub>2</sub>O or Pip); Treatment2: effect term for the subsequent treatment of leaves (Mock or SA).

Treatment1\*Treatment2: effect term for the interaction of treatments ("Priming").

Experiment: Term reflecting variation between experiments; Experiment\*Treatmentx: Term reflecting experimental impact on effect of treatment x; Experiment\*Treatment1\*Treatment2: Term reflecting experimental influence on treatment interaction.

SumSq: type II-sum of squares. Df: degrees of freedom. Pr(>F): P-value associated with a corresponding F value.

| Primer name      | Primer sequence (5' to 3')    | Usage                                          |
|------------------|-------------------------------|------------------------------------------------|
| <i>ald1-fw</i>   | TTACGATGCATTTGCTATGACC        | Left primer; genotyping of <i>sid2-1 ald1</i>  |
| <i>ald1-rv</i>   | TTTTAAATGGAACGCAAGGAG         | Right primer; genotyping of <i>sid2-1 ald1</i> |
| <i>ICS1-FW</i>   | GTATATGTGACAGAGTTGTTGTC       | Sequencing primer                              |
| LB               | TGGTTCACGTAAGTGGCCATC         | T-DNA Left Border primer                       |
| <i>ALD1-FW</i>   | GTGCAAGATCCTACCTTCCCGGC       | qRT-PCR                                        |
| <i>ALD1-RV</i>   | CGGTCCTTGGGGTCATAGCCAGA       | qRT-PCR                                        |
| <i>ARD3-FW</i>   | CATGGACTTATGTGAGGTGTG         | qRT-PCR                                        |
| <i>ARD3-RV</i>   | ACATCAAAGTATCCACTTCCTG        | qRT-PCR                                        |
| <i>FMO1-FW</i>   | TCTTCTGCGTGCCGTAGTTTC         | qRT-PCR                                        |
| <i>FMO1-RV</i>   | CGCCATTTGACAAGAAGCATAG        | qRT-PCR                                        |
| <i>ICS1-FV</i>   | GCAAGAGTGCAACATCTATATTCTC     | qRT-PCR; genotyping of <i>sid2-1 ald1</i>      |
| <i>ICS1-RV</i>   | CACAAACAGCTGGAGTTGGA          | qRT-PCR; genotyping of <i>sid2-1 ald1</i>      |
| <i>PR-1-FW</i>   | GTGCTCTTGTCTTCCCTCG           | qRT-PCR                                        |
| <i>PR-1-RV</i>   | GCCTGGTTGTGAACCCTTAG          | qRT-PCR                                        |
| <i>SAG13-FV</i>  | GCGACAACATAAGGACGA            | qRT-PCR                                        |
| <i>SAG13-RV</i>  | CTTCATTTGCTTCTCCAACAC         | qRT-PCR                                        |
| <i>GRXS13-FV</i> | GGTTGAGATTGGTGAAGAAGAC        | qRT-PCR                                        |
| <i>GRXS13-RV</i> | GCCATTAATATGAGCAGCCA          | qRT-PCR                                        |
| <i>PTB-FW</i>    | GATCTGAATGTTAAGGCTTTTAGCG     | qRT-PCR; reference gene                        |
| <i>PTB-RV</i>    | GGCTTAGATCAGGAAGTGTATAGTCTCTG | qRT-PCR; reference gene                        |

**Supplemental Table 4.** List of primers used in this study.
